# Supplementary material for: The synthesis and biological evaluation of sanguinarine derivatives as anti-non-small cell lung cancer agents
Source: Royal Society of Chemistry journal article supplement (doi:10.1039/c9md00494g), 2020-01-01
Supplement: c9md00494g1.pdf [file c9md00494g1.pdf]

## Supporting Information

### The synthesis and biological evaluation of sanguinarine derivatives as anti-non-small cell lung cancer agents

Liang Jiang<sup>#</sup>, Xiaolu Wang<sup>#</sup>, Yuting Wang, Fang Xu, Zhang Zhang<sup>\*</sup>, Ke Ding<sup>\*</sup>, Xiaoyun Lu<sup>\*</sup>

#### Contents of SI

|                                                                    |          |
|--------------------------------------------------------------------|----------|
| 1. General information                                             | S1       |
| 2. Synthetic procedures and compound characterization              | S1- S8   |
| 3. Materials and methods or biological studies                     | S8-S9    |
| 4. The <sup>1</sup> H and <sup>13</sup> C NMR spectra of compounds | S10- S25 |
| 5. HPLC Purity Analysis                                            | S26- S38 |

#### 1. General information

All chemicals were purchased from commercial vendors and used without further purification, unless indicated otherwise. All reactions requiring anhydrous conditions were carried out under argon atmosphere using oven-dried glassware. AR-grade solvents were used for all reactions. Reaction progress was monitored by TLC on pre-coated silica plates (Merck 60 F254 nm, 0.25 μm) and spots were visualized by UV, iodine or other suitable stains. Flash column chromatography was carried out using silica gel (Qingdao Ocean company). <sup>1</sup>H and <sup>13</sup>C NMR spectra were recorded on a Bruker AV-400 spectrometer at 400 MHz and 101 MHz, respectively. Coupling constants (*J*) are expressed in hertz (Hz). Chemical shifts (δ) of NMR are reported in parts per million (ppm) units relative to internal control (TMS). Mass spectra were obtained on Agilent LC-ESI-MS system. High resolution ESI-MS were recorded on an AB SCIEX X500r QTOF mass spectrometer. Purity of compounds was determined by reverse-phase high performance liquid chromatography (HPLC) analysis to be >95%. HPLC instrument: Dionex Summit HPLC (Column: Diamonsil C18, 5.0μm, 4.6×250 mm (Dikma Technologies); detector: PDA-100 photodiode array; inJector: ASI-100 autoinJector; pump: p-680A). A flow rate of 1.0 mL/min was used with mobile phase of MeOH in H<sub>2</sub>O.

## 2 Synthetic procedures and compound characterization

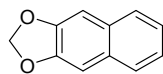

4

**naphtho[2,3-d][1,3]dioxole (4).** Naphthalene-2,3-diol **2** (20 g, 125 mmol, 1.00 eq), CH<sub>2</sub>Br<sub>2</sub> (25.4 mL, 361.8 mmol, 2.89 eq) and K<sub>2</sub>CO<sub>3</sub> (50 g, 361.8 mmol, 2.89 eq) were suspended in DMF (600mL). The reaction mixture was stirred at 100 °C for 10 h. After cooling to rt, the reaction was poured into a mixture of EtOAc (800 mL) and H<sub>2</sub>O (200 mL). The aqueous layer was removed and the organic layer was washed with H<sub>2</sub>O (250 mL) and saturated NaCl (250 mL). The organic layer was dried over NaSO<sub>4</sub> and the solvents were removed under reduced pressure. Further column chromatography on silica gel (PE) afforded **4** (12.5 g, yield 58%) as a white solid. R<sub>f</sub> = 0.25 (PE). <sup>1</sup>H NMR (400 MHz, Chloroform-d) δ 7.69 – 7.63 (m, 2H), 7.34 – 7.29 (m, 2H), 7.12 (s, 2H), 6.03 (s, 2H). <sup>13</sup>C NMR (101 MHz, Chloroform-d) δ 147.68, 130.59, 127.13, 124.49, 104.01, 101.11. Dept-135 (101 MHz, Chloroform-d) δ 127.03, 124.38, 103.90, 101.00.

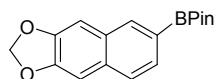

5

**4,4,5,5-tetramethyl-2-(naphtho[2,3-d][1,3]dioxol-6-yl)-1,3,2-dioxaborolane (5).** Two-neck bottle was charged with naphtho[2,3-d][1,3]dioxole **4** (10 g, 58.2 mmol, 1 equiv), bis(pinacolato)diboron (14.78 g, 58.2 mmol, 1 equiv), [Ir(OMe)cod]<sub>2</sub> (580 mg, 0.87 mmol, 1.5 mol %), and 4,4'-di-tert-butyl-2,2'-bipyridine (470 mg, 1.75 mmol, 3 mol %) and flushed with argon. Then cyclohexane (160 mL) was added and the reaction was heated to reflux for 24 h and quenched by adding water (100 mL) dropwise. The mixture was then extracted with EtOAc (200 mL) twice and the combined organic phase was dried with Na<sub>2</sub>SO<sub>4</sub> and concentrated under vacuum. Further column chromatography on silica gel (EtOAc: PE = 1: 50) afforded **5** (5.4 g, yield 31.1%) as a white solid. <sup>1</sup>H NMR (400 MHz, Chloroform-d) δ 8.17 (s, 1H), 7.70 (dd, J = 8.1, 1.2 Hz, 1H), 7.64 (d, J = 8.1 Hz, 1H), 7.15 (s, 1H), 7.11 (s, 1H), 6.04 (s, 2H), 1.38 (s, 12H). MS (ESI): m/z Calcd for For C<sub>17</sub>H<sub>20</sub>BO<sub>4</sub> [M + H]<sup>+</sup>: 299.15, found 299.1.

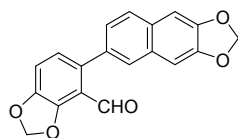

6

**5-(naphtho[2,3-d][1,3]dioxol-6-yl)benzo[d][1,3]dioxole-4-carbaldehyde (6).** Compound **5** (3.2g, 18.7 mmol, 1.1 equiv), 5-bromobenzo[d][1,3]dioxole-4-carbaldehyde (3.9g, 17 mmol, 1.0 equiv) and Pd(PPh<sub>3</sub>)<sub>2</sub>Cl<sub>2</sub> (600 mg, 0.857 mmol, 0.05 equiv) were added together, then the tube was evacuated and backfilled with Argon for 3 times. DME (160 mL), 2.0 M aq. K<sub>2</sub>CO<sub>3</sub> (33 mL) was then added by syringe under Argon. The mixture was stirred at 80°C for 4h and cooled to rt. EtOAc (200 mL) was added to the mixture and extracted with saturated NaCl twice. The organic phase was dried with Na<sub>2</sub>SO<sub>4</sub> and concentrated under vacuum. Further column chromatography on silica gel (EtOAc: PE = 1:10) afforded **6** (4.2 g, yield 77.1%) as a faint yellow solid. <sup>1</sup>H NMR (400 MHz, Chloroform-d) δ 9.87 (s, 1H), 7.70 (d, J = 8.3 Hz, 1H), 7.60 (d, J = 1.8 Hz, 1H), 7.31 (dd, J = 8.3, 1.8 Hz, 1H), 7.26 (s, 1H),

7.16 (s, 1H), 7.12 (s, 1H), 7.06 (d,  $J = 8.0$  Hz, 1H), 6.96 (d,  $J = 8.0$  Hz, 1H), 6.21 (s, 2H), 6.07 (s, 2H). MS (ESI):  $m/z$  Calcd for For  $C_{19}H_{13}O_5$   $[M + H]^+$ : 321.08, found 321.1.

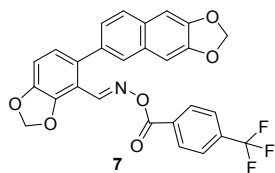

**(E)-5-(naphtho[2,3-d][1,3]dioxol-6-yl)benzo[d][1,3]dioxole-4-carbaldehyde O-(4-(trifluoromethyl)benzoyl) oxime (7).** A mixture of compound **6** (1.81 g, 5.66 mmol, 1.0 equiv),  $H_2NOH \cdot HCl$  (472 mg, 6.8 mmol, 1.2 equiv) and pyridine (683 mg, 8.5 mmol, 1.5 equiv) in MeOH (60 mL) was stirred under reflux for 6 h. MeOH was then removed under vacuo and the residue was dissolved in EtOAc (150 mL) and extracted with 1.0 M aq. HCl (60 mL). Organic phase was then extracted with saturated NaCl (100 mL) twice, dried with  $Na_2SO_4$  and concentrated under vacuum. The residue was then dissolved in dry  $CH_2Cl_2$  (100 mL) and added  $Et_3N$  (860 mg, 8.5 mmol, 1.5 equiv). 4-(trifluoromethyl)-benzoylchlorid (1.42g, 6.8 mmol, 1.2 equiv) was then added dropwise at  $0^\circ C$  and stirred at  $0^\circ C$  for another 30 min. Then, the mixture was poured into saturated  $NaHCO_3$  (100 mL) and extracted with  $CH_2Cl_2$  (100 mL) twice. The combined organic phases were then dried with  $Na_2SO_4$  and concentrated under vacuum. Further column chromatography on silica gel (EtOAc : PE = 1:20) afforded compound **7** (1.4 g, yield 49.3%) as a white solid.  $^1H$  NMR (400 MHz, Chloroform- $d$ )  $\delta$  8.40 (s, 1H), 8.14 (d,  $J = 8.1$  Hz, 2H), 7.72 (d,  $J = 8.4$  Hz, 1H), 7.68 (d,  $J = 8.2$  Hz, 2H), 7.58 (d,  $J = 1.8$  Hz, 1H), 7.28 (d,  $J = 1.8$  Hz, 1H), 7.15 (d,  $J = 8.3$  Hz, 2H), 7.02 – 6.93 (m, 2H), 6.25 (s, 2H), 6.06 (s, 2H). MS (ESI):  $m/z$  Calcd for For  $C_{27}H_{16}F_3NNaO_6$   $[M + H]^+$ : 530.08, found 529.7

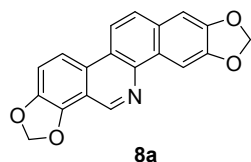

**[1,3]dioxolo[4',5':4,5]benzo[1,2-c][1,3]dioxolo[4,5-i]phenanthridine (8).** A 25 mL round bottom flask was equipped with a rubber septum and magnetic stir bar and was charged with **7** (1.3g, 2.56 mmol, 1.0 equiv), fac-Ir(ppy) $_3$  (50 mg, 0.0256 mmol, 0.01 equiv). The flask was evacuated and backfilled with Ar for 3 times. DMF (20 mL) was then added by syringe under Argon. The mixture was then irradiated by a 5W white LEDs strip. After the reaction was complete (as judged by TLC analysis), the mixture was concentrated under vacuum to remove DMF and dissolved in  $CHCl_3$  (200 mL). The solution was extracted with 1.0 M  $K_2CO_3$  (100 mL) twice. The organic phase was dried with  $Na_2SO_4$  and concentrated under vacuum. Further column chromatography on silica gel (EtOAc : PE = 1:10) afforded compound **8a** (700 mg, 86.3%) as a yellow solid.  $^1H$  NMR (400 MHz, DMSO- $d_6$ )  $\delta$  9.41 (s, 1H), 8.55 (d,  $J = 8.9$  Hz, 1H), 8.51 (s, 1H), 8.41 (d,  $J = 8.7$  Hz, 1H), 8.00 (d,  $J = 8.9$  Hz, 1H), 7.69 (d,  $J = 8.7$  Hz, 1H), 7.53 (s, 1H), 6.39 (s, 2H), 6.22 (s, 2H).  $^{13}C$  NMR (101 MHz, DMSO- $d_6$ )  $\delta$  148.73, 148.53, 145.65, 145.01, 143.56, 139.22, 129.94, 128.82, 128.03, 127.66, 120.55, 119.32, 116.74, 114.71, 112.35, 104.93, 103.39, 102.04, 101.41. HRMS (ESI):  $m/z$  Calcd For  $C_{19}H_{12}NO_4$   $[M + H]^+$ : 318.0766, found 318.0748. HPLC analysis: MeOH :  $H_2O$  (90 : 10), 11.78 min, 97.08% purity.

#### General Procedure for synthesis of compounds **8b** and **8c**.

Sodium borohydride (378mg, 10 mol, 20 equiv) was added portionwise to a stirred solution of the

compound **8a** (108mg, 0.5 mol, 1.0 equiv) in AcOH or CH<sub>3</sub>CH<sub>2</sub>COOH at room temperature. After being stirred at rt for 30 min, the reaction mixture was made weakly alkaline with 10% aq. NaOH and extracted with EtOAc. The organic phase was dried with Na<sub>2</sub>SO<sub>4</sub> and concentrated under vacuum. Further column chromatography on silica gel (EtOAc : PE = 1:20) afforded compound **8b** (49 mg, yield 28.7%) and compound **8c** (54 mg, yield 30%) as white solid. (for **8b**: NaBH<sub>4</sub>, AcOH, rt, 30min; for **8c**: NaBH<sub>4</sub>, CH<sub>3</sub>CH<sub>2</sub>COOH, rt, 30min.)

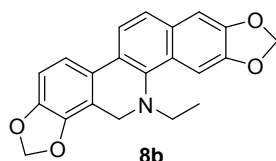

### 13-ethyl-13,14-dihydro-[1,3]dioxolo[4',5':4,5]benzo[1,2-c][1,3]dioxolo[4,5-i]phenanthridine (**8b**)

<sup>1</sup>H NMR (400 MHz, DMSO-*d*<sub>6</sub>) δ 7.76 (d, *J* = 8.6 Hz, 1H), 7.54 (d, *J* = 8.6 Hz, 1H), 7.47 (s, 1H), 7.38 (d, *J* = 8.2 Hz, 1H), 7.31 (s, 1H), 6.93 (d, *J* = 8.2 Hz, 1H), 6.13 (s, 2H), 6.10 (s, 2H), 4.15 (s, 2H), 2.69 (q, *J* = 6.9 Hz, 2H), 1.11 (t, *J* = 7.1 Hz, 3H). <sup>13</sup>C NMR (101 MHz, DMSO-*d*<sub>6</sub>) δ 147.86, 147.26, 146.84, 144.03, 141.87, 130.52, 126.91, 125.89, 124.22, 123.76, 120.19, 116.26, 113.42, 107.21, 104.28, 101.38, 101.23, 99.75, 46.67, 42.85, 13.52. HRMS (ESI): *m/z* Calcd For C<sub>21</sub>H<sub>18</sub>NO<sub>4</sub> [M + H]<sup>+</sup>: 348.1230, found 348.1223. HPLC analysis: MeOH : H<sub>2</sub>O (90 : 10), 13.75 min, 96.35% purity.

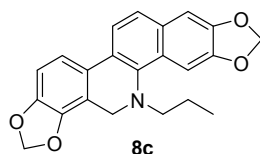

### 13-propyl-13,14-dihydro-[1,3]dioxolo[4',5':4,5]benzo[1,2-c][1,3]dioxolo[4,5-i]phenanthridine (**8c**)

<sup>1</sup>H NMR (400 MHz, DMSO-*d*<sub>6</sub>) δ 7.76 (d, *J* = 8.7 Hz, 1H), 7.55 (d, *J* = 8.7 Hz, 1H), 7.52 (s, 1H), 7.39 (d, *J* = 8.2 Hz, 1H), 7.31 (s, 1H), 6.93 (d, *J* = 8.2 Hz, 1H), 6.14 (s, 2H), 6.10 (s, 2H), 4.14 (s, 2H), 2.63 – 2.57 (m, 2H), 1.62 – 1.48 (m, 2H), 0.86 (t, *J* = 7.4 Hz, 3H). <sup>13</sup>C NMR (101 MHz, Chloroform-*d*) δ 148.14, 147.59, 147.14, 144.51, 142.91, 131.03, 127.93, 126.79, 124.95, 123.87, 120.45, 116.25, 114.44, 107.24, 104.50, 101.45, 101.14, 100.95, 54.74, 43.75, 21.68, 11.69. HRMS (ESI): *m/z* Calcd For C<sub>22</sub>H<sub>20</sub>NO<sub>4</sub> [M + H]<sup>+</sup>: 362.1387, found 362.1370. HPLC analysis: MeOH : H<sub>2</sub>O (90 : 10), 17.10 min, 96.42% purity.

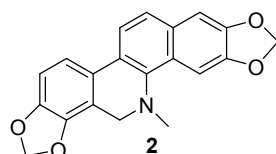

**13-methyl-13,14-dihydro-[1,3]dioxolo[4',5':4,5] benzo [1,2-c][1,3]dioxolo[4,5 -i] phenanthridine (2).** To the solution of sanguinarine chloride (**1**) (0.10 g, 0.27 mmol, 1.0 equiv) in 15mL of MeOH, of NaBH<sub>4</sub> (82 mg, 2.17 mmol, 8 equiv) was added. The reaction solution was stirred for 30 min at rt. The solvent was evaporated to dryness under reduced pressure. The residue was subjected to column chromatography over silica gel using petroleum ether-ethyl acetate (20 : 1) as eluent, and recrystallized from petroleum ether-ethyl acetate (20 : 1) as a red-white granule crystal ( 33 mg, yield 36%). <sup>1</sup>H NMR (400 MHz, DMSO-*d*<sub>6</sub>) δ 7.77 (d, *J* = 8.6 Hz, 1H), 7.56 (d, *J* = 8.6 Hz, 1H), 7.52 (s, 1H), 7.40 (d, *J* = 8.2

Hz, 1H), 7.31 (s, 1H), 6.95 (d,  $J = 8.2$  Hz, 1H), 6.14 (s, 2H), 6.11 (s, 2H), 4.13 (s, 2H), 2.51 (s, 3H).  $^{13}\text{C}$  NMR (101 MHz,  $\text{DMSO-}d_6$ )  $\delta$  147.92, 147.27, 146.92, 144.29, 141.87, 130.44, 126.38, 125.73, 123.94, 123.85, 120.29, 116.29, 112.82, 107.27, 104.23, 101.36, 101.24, 99.74, 47.90, 41.30. HRMS (ESI):  $m/z$  Calcd For  $\text{C}_{20}\text{H}_{16}\text{NO}_4$  [ $\text{M} + \text{H}$ ] $^+$ : 334.1074, found 334.1064. HPLC analysis: MeOH :  $\text{H}_2\text{O}$  : TEA (80 : 20 : 0.02), 17.78 min, 96.82% purity.

#### General procedure for synthesis of compounds 8d-8i.

A reaction mixture of chelerythrine chloride (**1**) (40 mg, 0.10 mmol, 1.0 equiv) and amines (1.0 mmol, 10 equiv) in acetonitrile (3 mL) is stirred at rt overnight. The off-white solid is filtered, washed with acetonitrile and dried to afford compounds **8d-8i**.

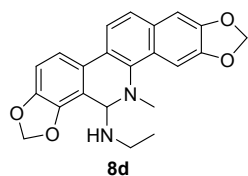

#### **N-ethyl-13-methyl-13,14-dihydro-[1,3]dioxolo[4',5':4,5]benzo[1,2-c][1,3]dioxolo[4,5i]**

**phenanthridine-14-amine (8d)**. A reaction mixture of chelerythrine chloride (**1**) (40 mg, 0.10 mmol) and ethylamine (45 mg, 1.0 mmol) in acetonitrile (3 mL) is stirred at rt overnight. The off-white solid is filtered, washed with acetonitrile and dried to afford off-white solid (15 mg, 39 %).  $^1\text{H}$  NMR (400 MHz,  $\text{DMSO-}d_6$ )  $\delta$  7.81 (d,  $J = 8.6$  Hz, 1H), 7.56 (s, 1H), 7.54 (d,  $J = 12.6$  Hz, 1H), 7.44 (d,  $J = 8.2$  Hz, 1H), 7.30 (s, 1H), 6.98 (d,  $J = 8.2$  Hz, 1H), 6.11 (d,  $J = 20.0$  Hz, 4H), 4.96 (s, 1H), 2.76 (dt,  $J = 14.1$ , 7.2 Hz, 1H), 2.65 (dd,  $J = 12.1$ , 6.6 Hz, 1H), 2.56 (s, 3H), 1.61 (s, 1H), 0.90 (t,  $J = 7.2$  Hz, 3H).  $^{13}\text{C}$  NMR (101 MHz,  $\text{DMSO-}d_6$ )  $\delta$  147.68, 147.08, 146.74, 144.49, 138.87, 130.48, 126.79, 124.99, 123.29, 122.86, 120.09, 116.19, 115.20, 107.74, 104.19, 101.34, 101.10, 99.68, 69.30, 40.68, 38.73, 14.70. HPLC analysis: MeOH :  $\text{H}_2\text{O}$  (90: 10), 6.88 min, 99.95% purity.

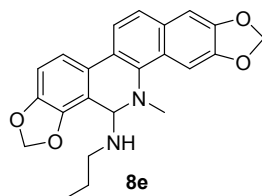

#### **13-methyl-N-propyl-13,14-dihydro-[1,3]dioxolo[4',5':4,5]benzo[1,2-c][1,3]dioxolo[4,5-**

**i]phenanthridin-14-amine (8e)**. A reaction mixture of chelerythrine chloride (**1**) (40 mg, 0.10 mmol) and propylamine (59 mg, 1.0 mmol) in acetonitrile (3 mL) is stirred at room temperature overnight. The off-white solid is filtered, washed with acetonitrile and dried to afford off-white solid (25 mg, yield 64 %).  $^1\text{H}$  NMR (400 MHz,  $\text{DMSO-}d_6$ )  $\delta$  7.81 (d,  $J = 8.7$  Hz, 1H), 7.56 (s, 1H), 7.53 (d,  $J = 8.7$  Hz, 1H), 7.44 (d,  $J = 8.2$  Hz, 1H), 7.30 (s, 1H), 6.98 (d,  $J = 8.2$  Hz, 1H), 6.16 – 6.07 (m, 4H), 4.94 (d,  $J = 6.9$  Hz, 1H), 2.65 (t,  $J = 6.7$  Hz, 2H), 2.56 (s, 3H), 1.58 (d,  $J = 6.8$  Hz, 1H), 1.41 – 1.19 (m, 2H), 0.74 (t,  $J = 7.4$  Hz, 3H).  $^{13}\text{C}$  NMR (101 MHz,  $\text{DMSO-}d_6$ )  $\delta$  148.23, 147.63, 147.30, 145.05, 139.46, 131.03, 127.37, 125.55, 123.84, 123.42, 120.63, 116.75, 115.80, 108.30, 104.74, 101.91, 101.66, 100.22, 69.93, 46.92, 41.25, 22.72, 12.25. HPLC analysis: MeOH :  $\text{H}_2\text{O}$  (90 : 10), 6.99 min, 99.77% purity.

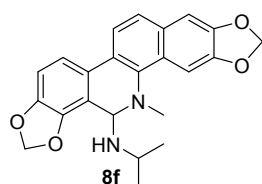

**N-isopropyl-13-methyl-13,14-dihydro-[1,3]dioxolo[4',5':4,5]benzo[1,2-c][1,3]dioxolo[4,5-*i*]phenanthridin-14-amine (8f).** A reaction mixture of chelerythrine chloride (**1**) (40 mg, 0.10 mmol) and Isopropylamine (59 mg, 1.0 mmol) in acetonitrile (3 mL) is stirred at room temperature overnight. The off-white solid is filtered, washed with acetonitrile and dried to afford off-white solid (13 mg, yield 33 %). <sup>1</sup>H NMR (400 MHz, DMSO-*d*<sub>6</sub>) δ 7.82 (d, *J* = 8.7 Hz, 1H), 7.54 (t, *J* = 4.3 Hz, 2H), 7.44 (d, *J* = 8.2 Hz, 1H), 7.31 (s, 1H), 6.98 (d, *J* = 8.1 Hz, 1H), 6.15 (d, *J* = 6.2 Hz, 2H), 6.14 – 6.07 (m, 2H), 5.05 (d, *J* = 8.4 Hz, 1H), 3.27 – 3.10 (m, 1H), 2.56 (s, 3H), 1.41 (s, 1H), 1.09 (d, *J* = 6.1 Hz, 3H), 0.76 (d, *J* = 6.4 Hz, 3H). <sup>13</sup>C NMR (101 MHz, DMSO-*d*<sub>6</sub>) δ 147.67, 147.07, 146.77, 138.65, 130.47, 126.77, 124.89, 123.35, 122.86, 120.08, 116.22, 115.27, 107.71, 104.21, 101.35, 101.10, 99.57, 66.93, 43.00, 40.62, 40.03, 23.80, 21.43. HPLC analysis: MeOH : H<sub>2</sub>O (90 : 10), 6.92 min, 99.81% purity.

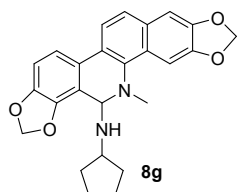

**N-cyclopentyl-13-methyl-13,14-dihydro-[1,3]dioxolo[4',5':4,5]benzo[1,2-c][1,3]dioxolo[4,5-*i*]phenanthridin-14-amine (8g).** A reaction mixture of chelerythrine chloride (**1**) (40 mg, 0.10 mmol) and cyclopentylamine (85 mg, 1.0 mmol) in acetonitrile (3 mL) is stirred at room temperature overnight. The off-white solid is filtered, washed with acetonitrile and dried to afford off-white solid (21 mg, yield 50 %). <sup>1</sup>H NMR (400 MHz, DMSO-*d*<sub>6</sub>) δ 7.81 (d, *J* = 8.7 Hz, 1H), 7.55 (s, 1H), 7.53 (d, *J* = 8.7 Hz, 1H), 7.43 (d, *J* = 8.3 Hz, 1H), 7.30 (s, 1H), 6.97 (d, *J* = 8.3 Hz, 1H), 6.16 – 6.14 (m, 2H), 6.14 – 6.06 (m, 2H), 4.98 (d, *J* = 7.6 Hz, 1H), 3.45 (tt, *J* = 8.5, 4.3 Hz, 1H), 2.57 (s, 3H), 1.85 (dt, *J* = 12.4, 6.3 Hz, 1H), 1.65 – 1.32 (m, 7H), 1.06 (dq, *J* = 13.5, 7.1 Hz, 1H). <sup>13</sup>C NMR (101 MHz, DMSO-*d*<sub>6</sub>) δ 148.20, 147.63, 147.32, 144.95, 139.49, 131.05, 127.33, 125.45, 123.84, 123.37, 120.64, 116.73, 115.84, 108.28, 104.76, 101.94, 101.67, 100.30, 68.95, 55.05, 41.42, 33.73, 32.28, 24.01, 23.94. HPLC analysis: MeOH : H<sub>2</sub>O (90 : 10), 6.84 min, 100% purity.

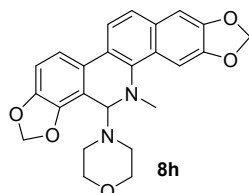

**13-methyl-14-morpholino-13,14-dihydro-[1,3]dioxolo[4',5':4,5]benzo[1,2-c][1,3]dioxolo[4,5-*i*]phenanthridine (8h).** A reaction mixture of chelerythrine chloride (**1**) (40 mg, 0.10 mmol) and morpholine (87 mg, 1.0 mmol) in acetonitrile (3 mL) is stirred at room temperature overnight. The off-white solid is filtered, washed with acetonitrile and dried to afford off-white solid (21 mg, yield 50 %). <sup>1</sup>H NMR (400 MHz, Chloroform-*d*) δ 7.72 (d, *J* = 8.5 Hz, 1H), 7.64 (s, 1H), 7.46 (d, *J* = 8.5 Hz, 1H), 7.37 (d, *J* = 8.1 Hz, 1H), 7.11 (s, 1H), 6.93 (d, *J* = 8.2 Hz, 1H), 6.15 – 5.97 (m, 4H), 4.65 (s, 1H), 3.46 (dt, *J* = 6.3, 3.1 Hz, 4H), 2.83 (dt, *J* = 10.4, 4.2 Hz, 2H), 2.69 (s, 3H), 2.38 – 2.24 (m, 2H). <sup>13</sup>C NMR (101 MHz, Chloroform-*d*) δ 148.16, 147.56, 146.94, 146.17, 140.59, 131.22, 126.93, 126.58, 123.64, 123.46, 120.12, 116.44, 112.79, 108.46, 104.71, 101.59, 101.18, 100.92, 76.69, 67.11, 49.16, 42.49. HPLC analysis: MeOH : H<sub>2</sub>O (90 : 10), 7.14 min, 99.36% purity.

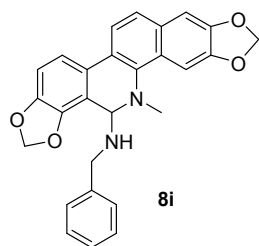

**N-benzyl-13-methyl-13,14-dihydro-[1,3]dioxolo[4',5':4,5]benzo[1,2-c][1,3]dioxolo[4,5-i]phenanthridin-14-amine (8i).**

A reaction mixture of chelerythrine chloride (**1**) (40 mg, 0.10 mmol) and benzylamine (107 mg, 1.0 mmol) in acetonitrile (3 mL) is stirred at room temperature overnight. The off-white solid is filtered, washed with acetonitrile and dried to afford off-white solid (25 mg, yield 57 %). <sup>1</sup>H NMR (400 MHz, DMSO-*d*<sub>6</sub>) δ 7.84 (d, *J* = 8.6 Hz, 1H), 7.65 (s, 1H), 7.56 (d, *J* = 8.6 Hz, 1H), 7.46 (d, *J* = 8.2 Hz, 1H), 7.35 – 7.26 (m, 5H), 7.24 – 7.17 (m, 1H), 6.99 (d, *J* = 8.2 Hz, 1H), 6.16 (d, *J* = 3.5 Hz, 2H), 6.10 (dd, *J* = 31.7, 1.1 Hz, 2H), 4.87 (s, 1H), 3.97 (d, *J* = 13.9 Hz, 1H), 3.76 (d, *J* = 13.9 Hz, 1H), 2.51 (s, 3H), 2.28 (s, 1H). <sup>13</sup>C NMR (101 MHz, DMSO-*d*<sub>6</sub>) δ 147.72, 147.06, 146.74, 140.38, 138.66, 130.50, 127.95, 127.92, 126.31, 125.13, 123.34, 122.93, 120.09, 116.19, 115.08, 107.80, 104.21, 101.35, 101.10, 99.72, 67.96, 47.32, 40.48. HPLC analysis: MeOH : H<sub>2</sub>O (90 : 10), 6.94 min, 100% purity.

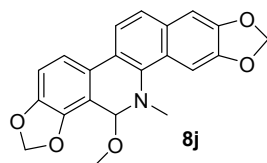

**14-methoxy-13-methyl-13,14-dihydro-[1,3]dioxolo[4',5':4,5]benzo[1,2-c][1,3]dioxolo[4,5-i]phenanthridine (8j).** To the solution of chelerythrine chloride (**1**) (0.12 g, 0.33 mmol, 1.0 equiv.) in 40 mL of MeOH, 4 mL of the solution of CH<sub>3</sub>ONa in MeOH was added for (**1**) to pH 10, and refluxed for 6h. 15 ml of H<sub>2</sub>O were added to the reaction solution, and extracted with CHCl<sub>3</sub>. The solvent was evaporated to dryness under reduced pressure, and the residue was recrystallised in MeOH. 6-Methoxysanguinarine **8j** as a white crystal (45 mg, yield 37 %). <sup>1</sup>H NMR (400 MHz, DMSO-*d*<sub>6</sub>) δ 7.84 (d, *J* = 8.7 Hz, 1H), 7.59 (s, 1H), 7.55 (d, *J* = 8.7 Hz, 1H), 7.51 (d, *J* = 8.3 Hz, 1H), 7.33 (s, 1H), 7.06 (d, *J* = 8.3 Hz, 1H), 6.19 – 6.11 (m, 4H), 5.34 (s, 1H), 3.32 (s, 3H), 2.71 (s, 3H). <sup>13</sup>C NMR (101 MHz, DMSO-*d*<sub>6</sub>) δ 148.39, 147.71, 147.37, 145.35, 138.34, 131.05, 126.59, 125.52, 123.92, 122.77, 120.42, 116.60, 113.40, 109.24, 104.86, 102.19, 101.76, 100.25, 85.55, 53.72, 41.06. HPLC analysis: MeOH : H<sub>2</sub>O (90 : 10), 6.71 min, 98.76% purity.

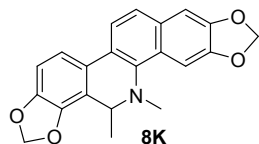

**13,14-dimethyl-13,14-dihydro-[1,3]dioxolo[4',5':4,5]benzo[1,2-c][1,3]dioxolo[4,5-i]phenanthridine (8k).**

In a dry and inert 25 mL Schlenk tube, chelerythrine chloride (**1**) (0.12 g, 0.33 mmol, 1.0 equiv) was suspended in anhydrous THF (10 mL, purged with argon) and cooled to 0 °C in an ice bath. CH<sub>3</sub>MgBr (1M in THF, 1 mL, 0.99 mmol, 3.00 eq) was added dropwise. The reaction mixture was allowed to reach rt and stirring was continued until a clear solution was obtained. Afterwards, the reaction mixture was quenched with water and extracted with EA (40 mL, three times). The combined organic layers were washed with brine, dried over magnesium sulfate. The solvent was removed under reduced

pressure. Further column chromatography on silica gel (EtOAc : PE = 1:25) afforded a white solid **8k** (40mg, yield 29 %). <sup>1</sup>H NMR (400 MHz, DMSO-d<sub>6</sub>) δ 7.79 (d, J = 8.7 Hz, 1H), 7.55 (d, J = 8.4 Hz, 1H), 7.54 (s, 1H), 7.44 (d, J = 8.2 Hz, 1H), 7.30 (s, 1H), 6.94 (d, J = 8.1 Hz, 1H), 6.15 – 6.07 (m, 4H), 4.33 (q, J = 6.9 Hz, 1H), 2.52 (s, 3H), 1.05 (d, J = 6.9 Hz, 3H). <sup>13</sup>C NMR (101 MHz, DMSO-d<sub>6</sub>) δ 147.92, 147.29, 146.80, 143.97, 139.40, 130.53, 126.98, 124.63, 123.80, 122.93, 120.08, 118.05, 116.53, 107.20, 104.20, 101.40, 101.22, 99.76, 52.30, 42.53, 20.05. HRMS (ESI): m/z Calcd For C<sub>21</sub>H<sub>18</sub>NO<sub>4</sub> [M + H]<sup>+</sup>: 348.1230, found 348.1219. HPLC analysis: MeOH : H<sub>2</sub>O (90 : 10), 12.41 min, 98.92% purity.

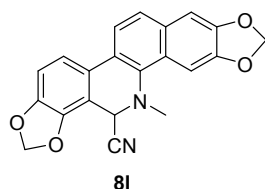

**13-methyl-13,14-dihydro-[1,3]dioxolo[4',5':4,5]benzo[1,2-c][1,3]dioxolo[4,5-i]phenanthridine-14-carbonitrile (8l).** Add CH<sub>3</sub>CN to a mixture of chelerythrine chloride (**1**) (0.12 g, 0.33 mmol, 1.0 equiv), CsF (55 mg, 0.36 mmol, 1.1 equiv), trimethylsilyl cyanide (36mg, 0.36 mmol, 1.1 equiv) in a ball flask at rt for 3h. Afterwards, the reaction mixture was quenched with water and extracted with EA (three times). The combined organic layers were washed with brine, dried over magnesium sulfate. The solvent was removed under reduced pressure. Further column chromatography on silica gel (EtOAc : PE = 1:20) afforded **8l** as a white solid (70mg, yield 59 %). <sup>1</sup>H NMR (400 MHz, DMSO-d<sub>6</sub>) δ 7.87 (d, J = 8.7 Hz, 1H), 7.67 (d, J = 8.6 Hz, 1H), 7.55 (d, J = 8.3 Hz, 1H), 7.52 (s, 1H), 7.38 (s, 1H), 7.13 (d, J = 8.1 Hz, 1H), 6.23 (d, J = 26.1 Hz, 2H), 6.18 (d, J = 2.7 Hz, 2H), 5.95 (s, 1H), 2.60 (s, 3H). <sup>13</sup>C NMR (101 MHz, DMSO-d<sub>6</sub>) δ 148.32, 147.65, 147.61, 144.66, 138.09, 130.69, 125.75, 125.01, 124.83, 122.56, 120.07, 118.08, 117.17, 109.34, 107.20, 104.29, 102.26, 101.39, 99.33, 47.30, 40.79. HRMS (ESI): m/z Calcd For C<sub>21</sub>H<sub>15</sub>N<sub>2</sub>O<sub>4</sub> [M + H]<sup>+</sup>: 359.1026, found 359.1026. HPLC analysis: MeOH : H<sub>2</sub>O (90 : 10), 5.38 min, 96.12% purity.

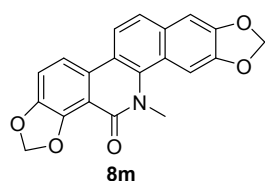

**13-methyl-[1,3]dioxolo[4',5':4,5]benzo[1,2-c][1,3]dioxolo[4,5-i]phenanthridin-14(13H)-one (8m).** To a hot solution (90°C) of chelerythrine chloride (**1**) (0.12 g, 0.33 mmol, 1.0 equiv) in 50mL of 0.2% HCl in water was added a hot solution (80°C) of K<sub>3</sub>Fe(CN)<sub>6</sub> (0.8 g) in H<sub>2</sub>O (10 mL) with stirring. Stirring was continued for 3 h at 90°C. During the reaction, 5mL of 3% KOH in water was added every 30 min. After cooling, the precipitate was collected. The solid was dissolved in CHCl<sub>3</sub>, washed with water and dried over Na<sub>2</sub>SO<sub>4</sub>. The residue was recrystallised from CHCl<sub>3</sub>-acetone. compound **8m** as a grey amorphous powder (50 mg, yield 43%). <sup>1</sup>H NMR (400 MHz, DMSO-d<sub>6</sub>) δ 8.19 (d, J = 8.7 Hz, 1H), 7.99 (d, J = 8.6 Hz, 1H), 7.72 (s, 1H), 7.64 (d, J = 8.7 Hz, 1H), 7.43 (d, J = 8.5 Hz, 1H), 7.41 (s, 1H), 6.27 (s, 2H), 6.18 (s, 2H), 3.76 (s, 3H). <sup>13</sup>C NMR (101 MHz, Chloroform-d) δ 162.83, 147.90, 147.79, 147.66, 147.25, 135.70, 131.97, 128.93, 123.68, 121.28, 118.83, 117.42, 115.58, 113.34, 111.02, 104.85, 103.03, 102.65, 101.68, 40.99. HRMS (ESI): m/z Calcd For C<sub>20</sub>H<sub>13</sub>NO[M + H]<sup>+</sup>: 348.0866, found 348.0867. HPLC analysis: MeOH : H<sub>2</sub>O (90 : 10), 7.28 min, 100% purity.



### 3. Materials and methods of biological studies

#### Antibodies

The antibodies used in this study were as follows: anti-GAPDH (Beyotime); anti-AKT, anti-p-AKT, anti-caspase3, anti-cleaved-caspase3, anti-caspase9, anti-cleaved-caspase9, anti-PARP, goat anti-rabbit IgG-HRP and goat anti-mouse IgG-HRP antibody (Cell Signaling Technology).

#### Cell Culture and Treatment

A549 and H1975 cell lines were obtained from the Cell Research Institute of the Chinese Academy of Sciences (Shanghai, China). The cells were cultured in 1640 medium (Gibco, CA, USA) containing 10% fetal bovine serum (Gibco), penicillin (100U/ml, Gibco), and streptomycin (100µg/ml, Gibco) under a humid 5% CO<sub>2</sub> atmosphere at 37 °C. For drug treatment, A549 and H1975 cells were treated with D3896 for 72h. **8h** with a purity of ≥98% according to HPLC was dissolved in DMSO to prepare a stock solution.

#### Cell Counting Kit-8 Assay

The viability of A549 and H1975 was measured by using a cell counting kit-8 (Dojindo, Japan). In brief,  $3 \times 10^3$  cells were seeded into each well of the 96-well plates and incubated overnight for attachment. After 72 h treatments of **8h**, the cells were incubated with CCK-8 solution at 37°C for 2 hr. The absorbance under 450 nm was detected by using a microplate reader (Bio-TEK instruments, VT, USA). The results were expressed as the mean percentage of absorbance in treated versus control cells. .

#### Cell Cycle and Cell Apoptosis Assay

Flow cytometry was conducted to determine the cell cycle distribution and apoptosis of A549 and H1975 cells after **8h** treatment. Briefly, A549 and H1975 cells were seeded in six-well plates and cultured overnight, then the cells were incubated with **8h** for 24h or 48h to test cell cycle and apoptosis respectively. The cells were prepared according to instruction of the BD Cycletest Plus DNA Reagent kit (BD Biosciences) and FITC-Annexin V Apoptosis Detection Kit (BD Pharmingen, USA) and then detected by a flow cytometer (Guawa easyCyte, USA ).

#### Western Blotting.

At the end of treatment, the cells were harvested and lysed using RIPA lysis buffer. Equal amounts of protein per sample were loaded in each lane and separated by 12% SDS-PAGE and then transferred to PVDF membranes. The membranes were blocked with 5% milk for 2 h at room temperature and incubated with the indicated antibodies overnight at 4 °C. The PVDF membranes were further incubated with HRP-conjugated secondary antibodies for 2 h at room temperature. The protein bands were visualized using a Super Signal West Pico Chemiluminescent Substrate Trial Kit (Pierce, Rockford, IL). Images were obtained using an Amersham Imager 600 (GE, UK).

#### Determination of ROS Production

Flow cytometry was conducted to determine ROS production in A549 and H1975 cells after **8h** treatment. The intracellular ROS level was measured using a 2',7'-dichlorofluorescein diacetate (DCFH-DA) fluorescent probe. Briefly, 20 minutes later after **8h** treatment, A549 and H1975 cells were washed with PBS and incubated with 10µM DCFH-DA in phenol red-free DMEM medium for 30 min at 37 °C in the dark. DCFH-DA will be cleaved by intracellular esterases and be oxidized into the highly fluorescent dichlorofluorescein (DCF) by ROS. The cells were then washed with PBS for 3 times to remove the residual DCFH-DA. ROS-positive cells were monitored by a flow cytometer (Guawa easyCyte, USA ) with excitation at 488 nm and emission

at 530 nm.

### $^1\text{H}$ and $^{13}\text{C}$ NMR Spectra

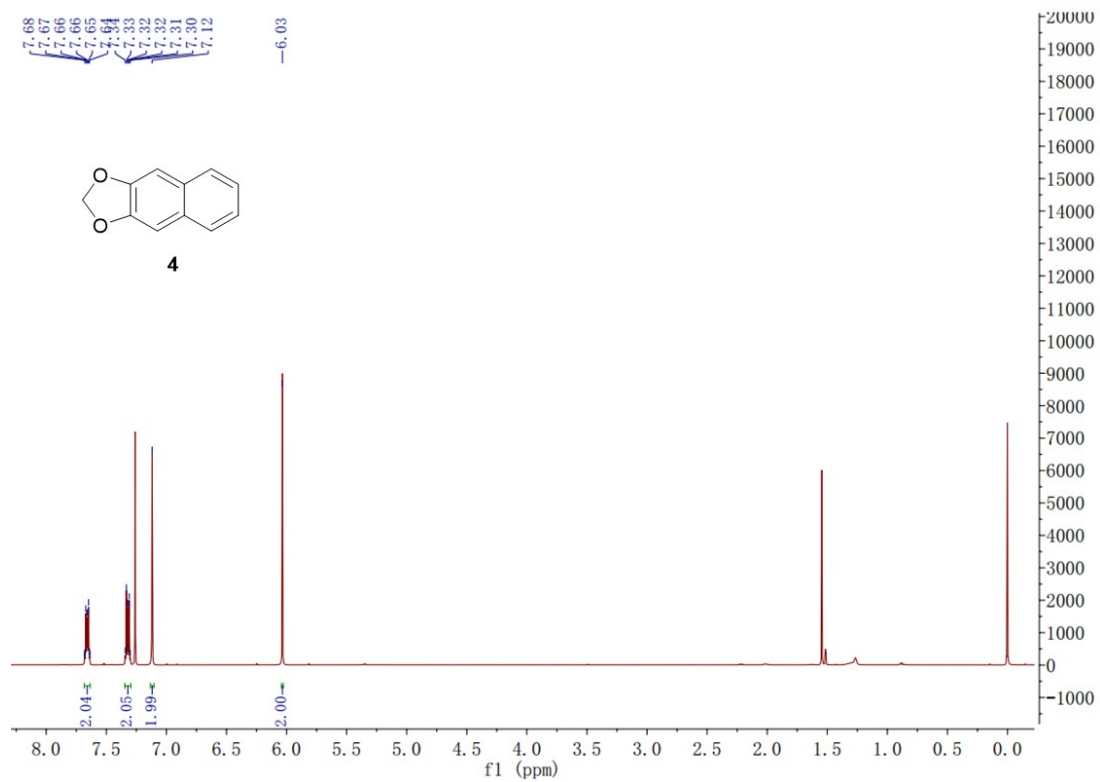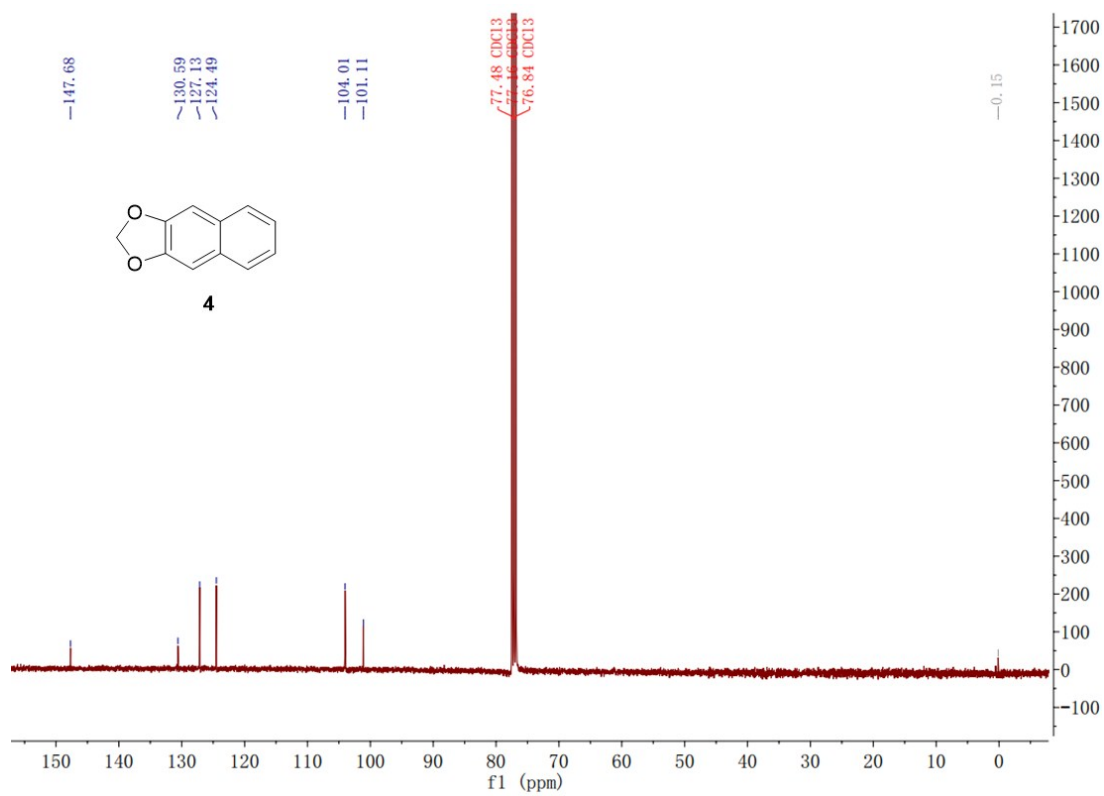

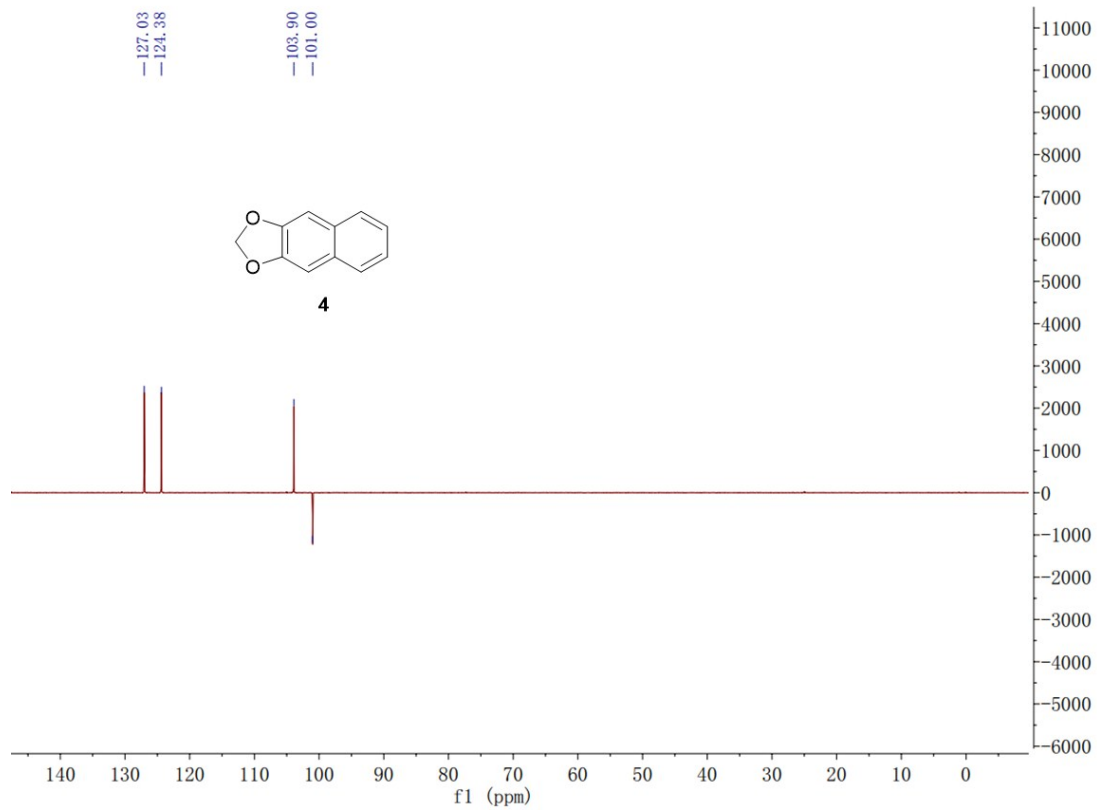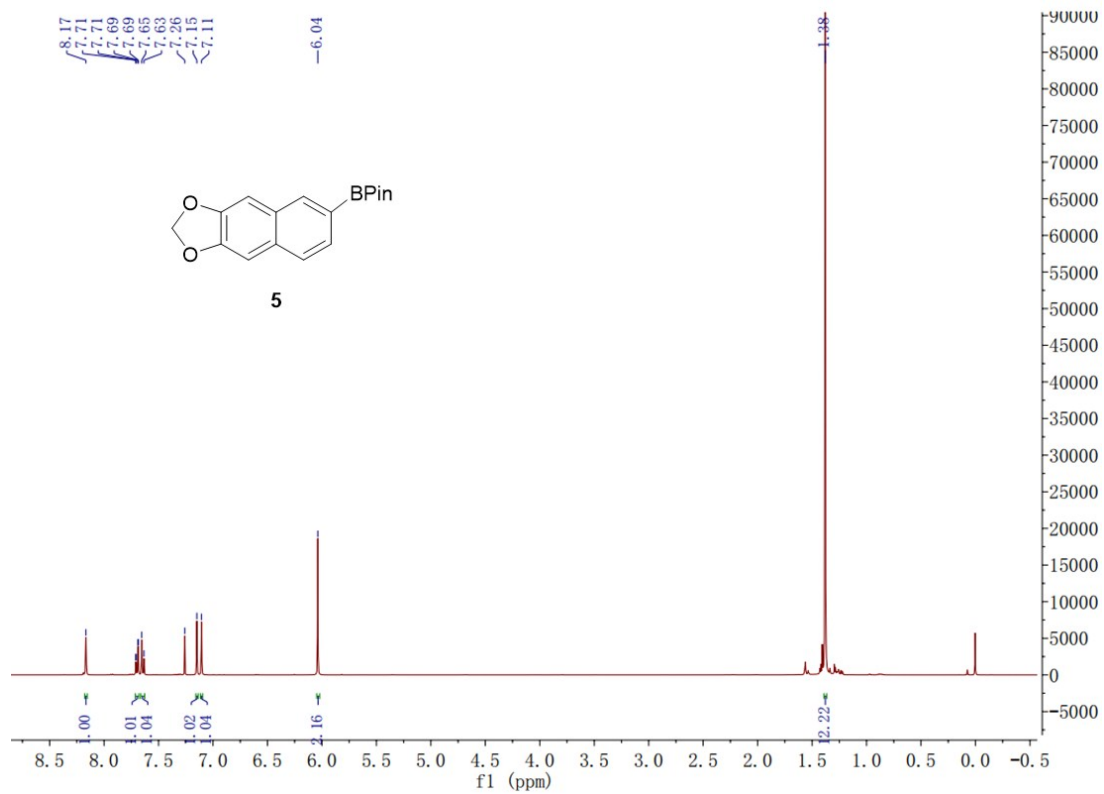

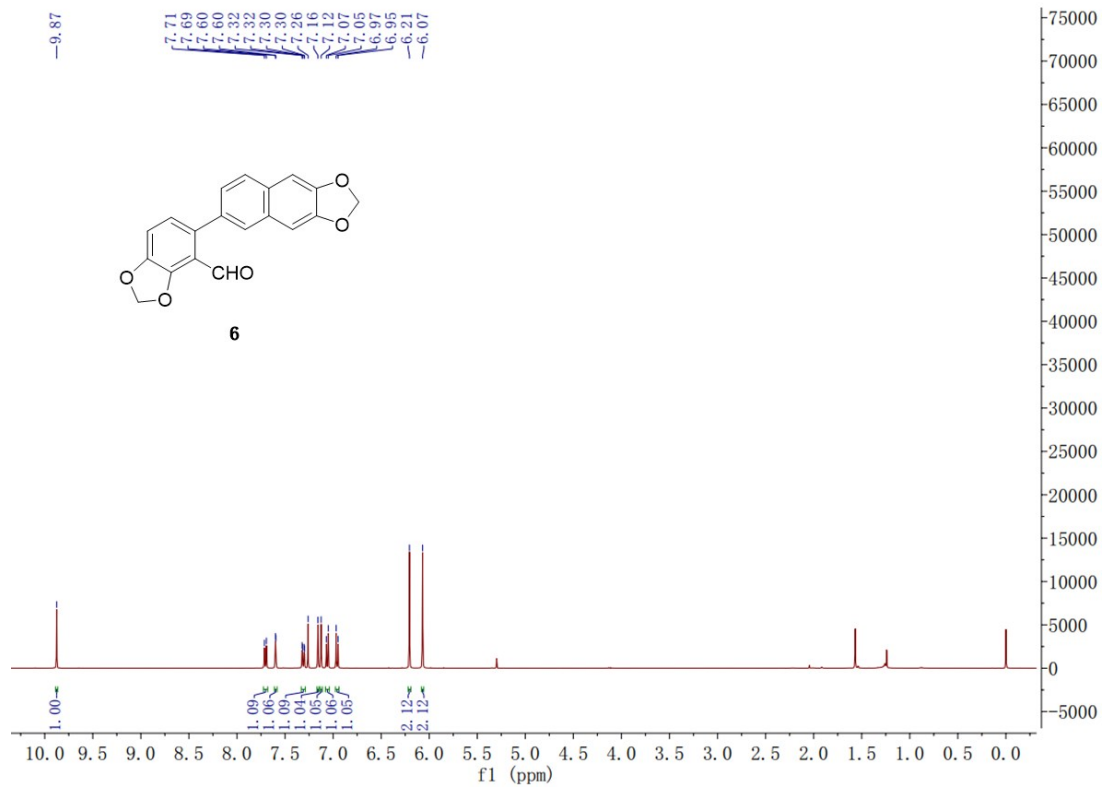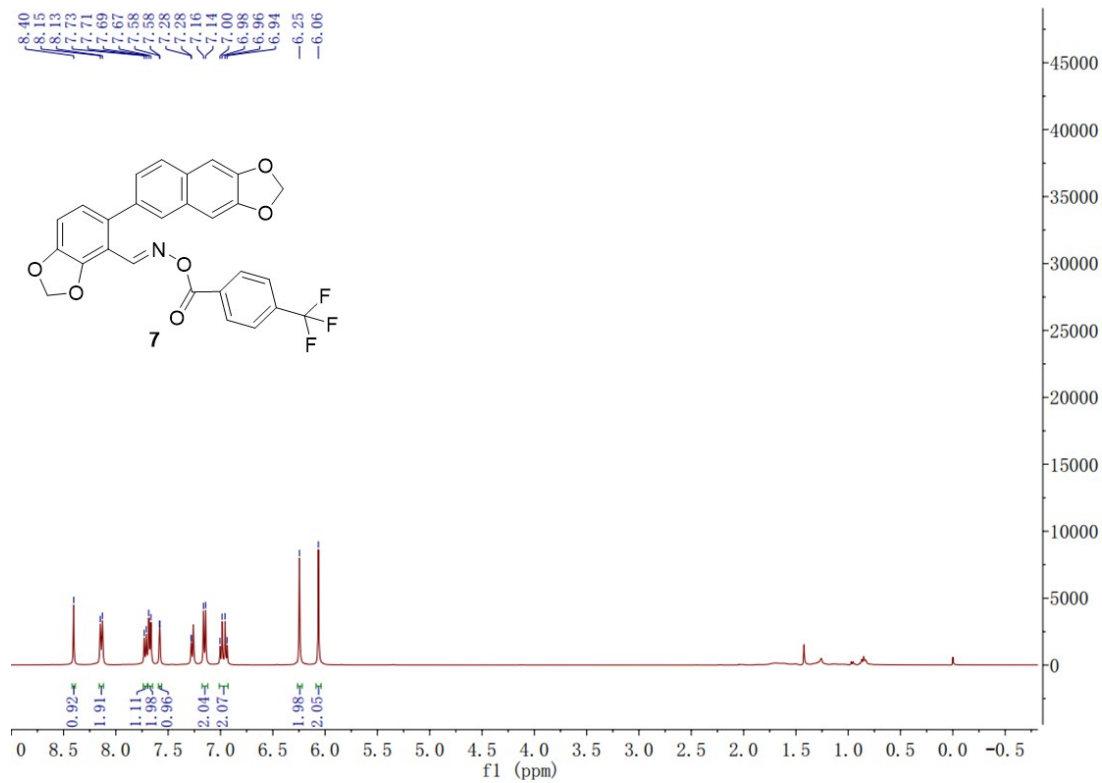

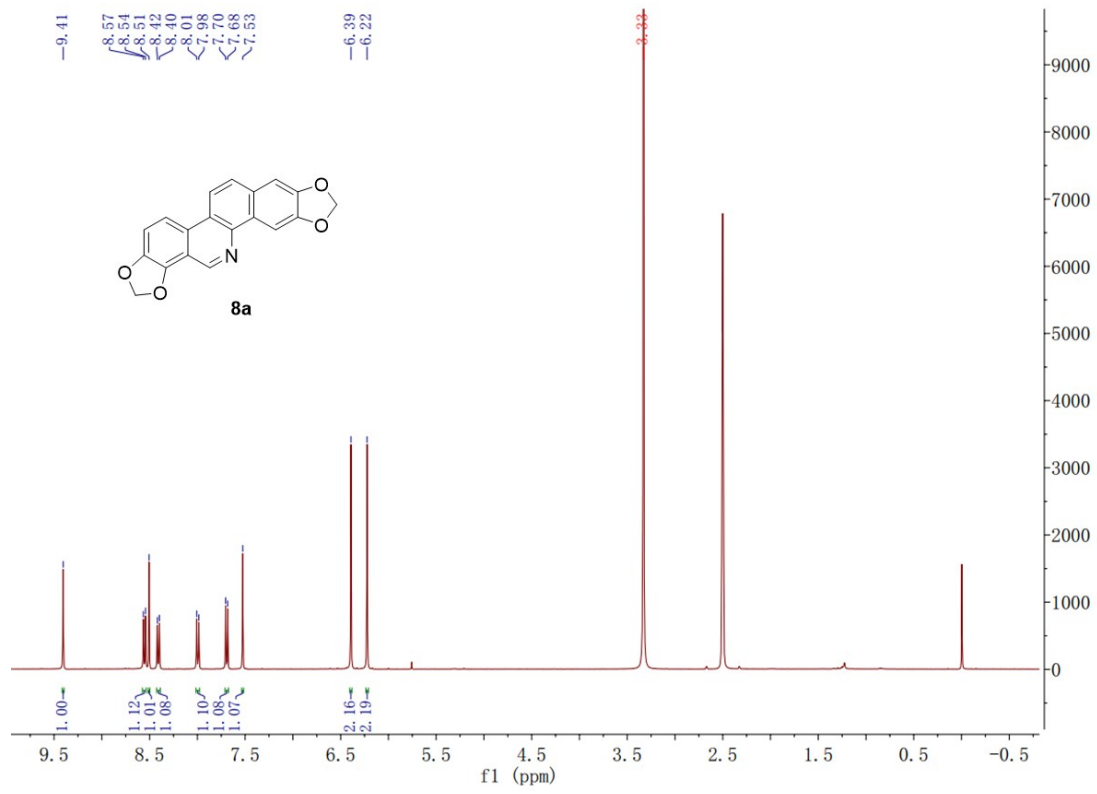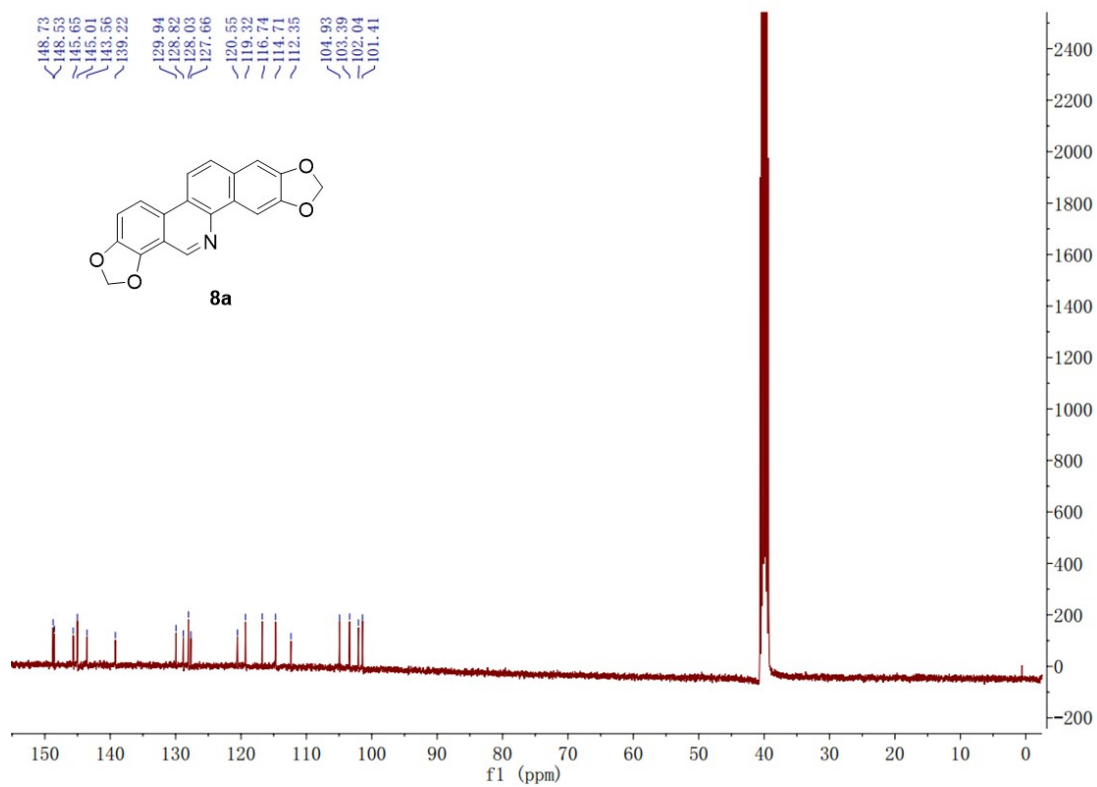

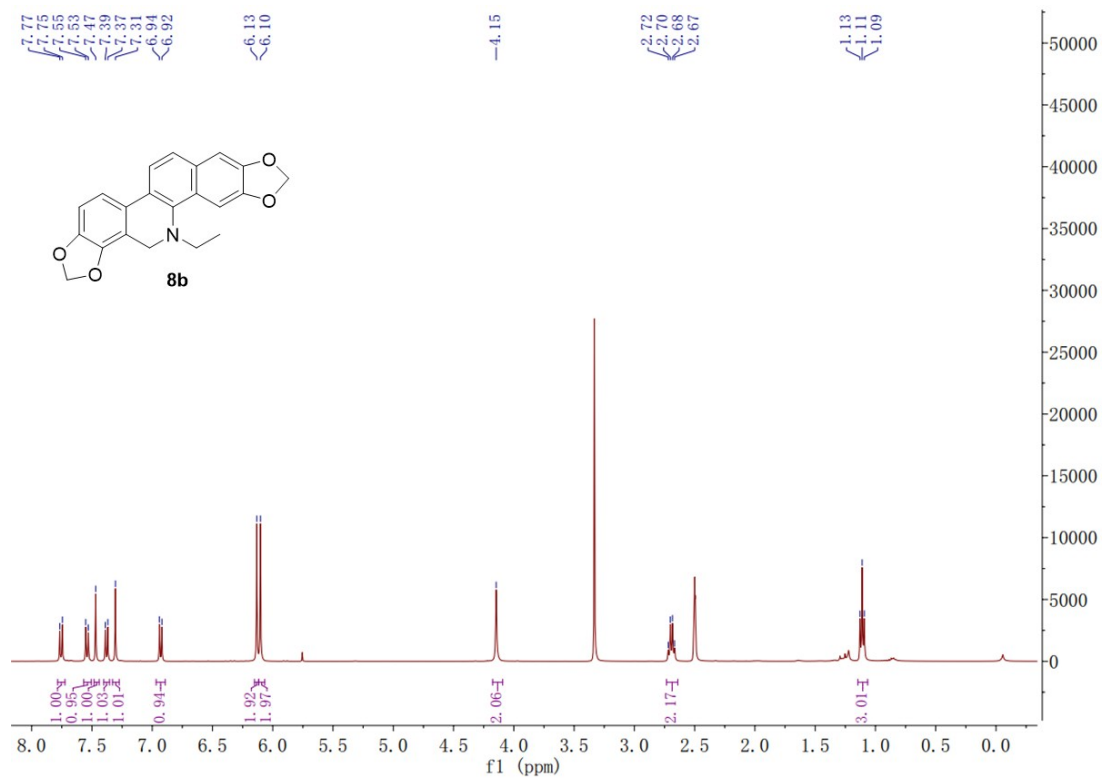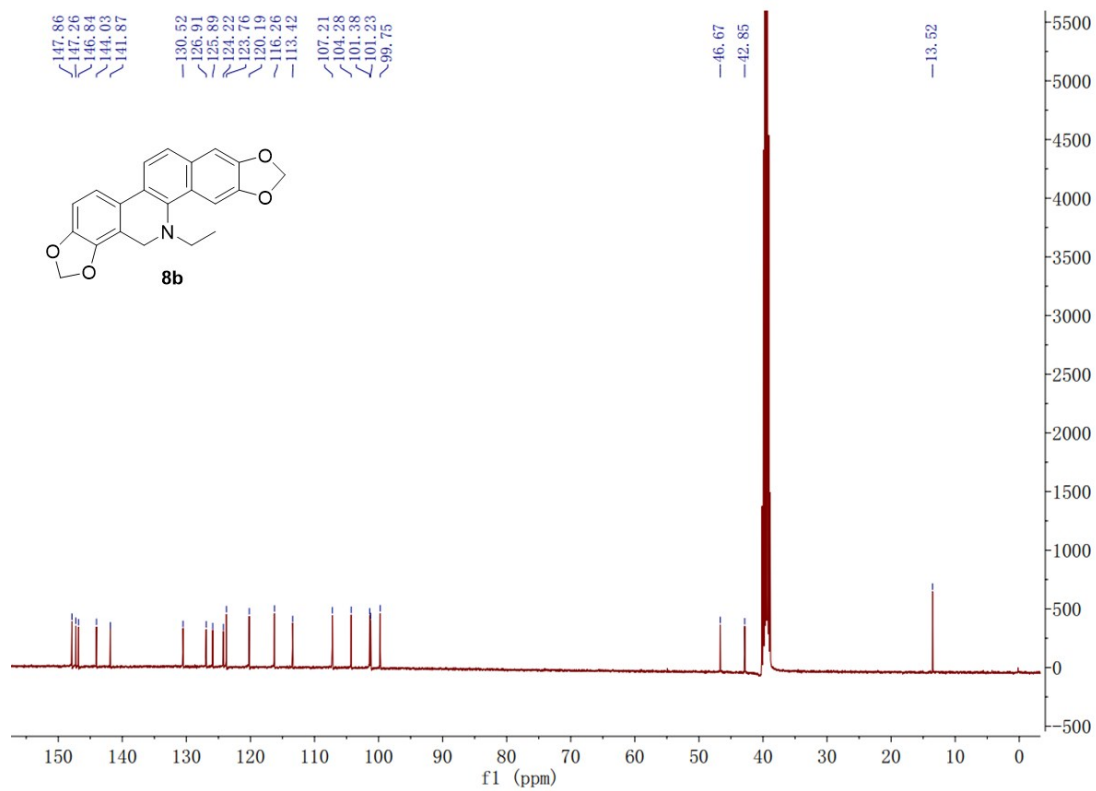

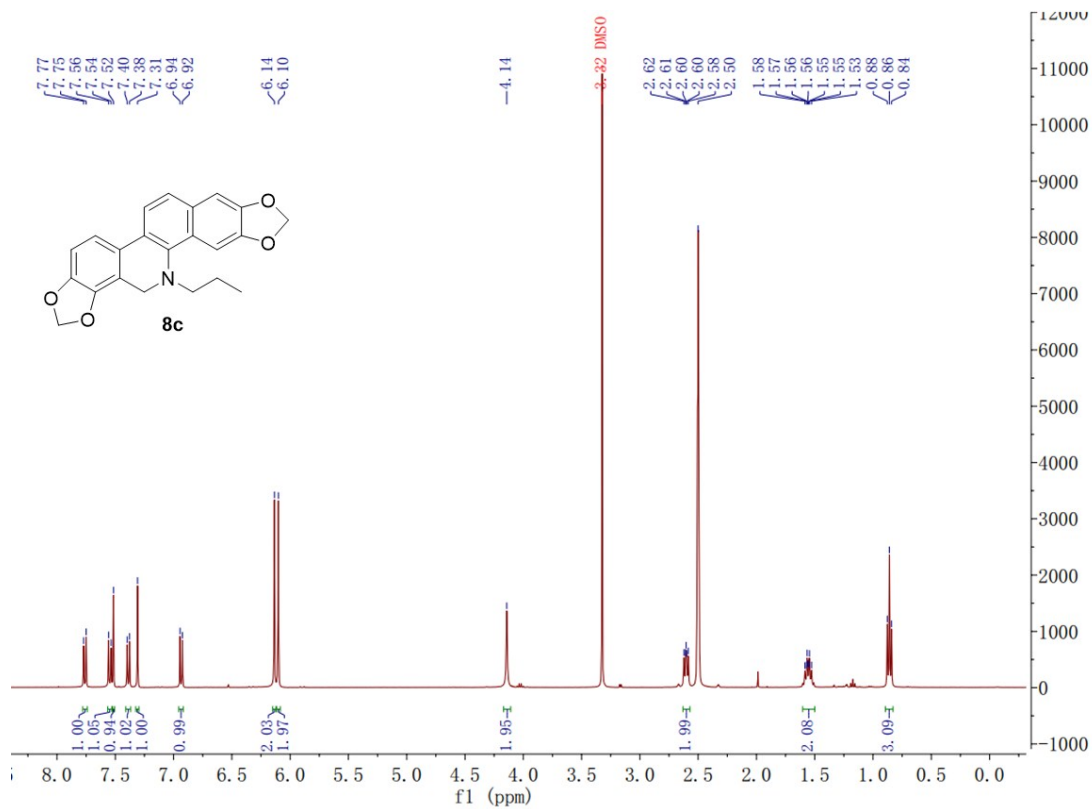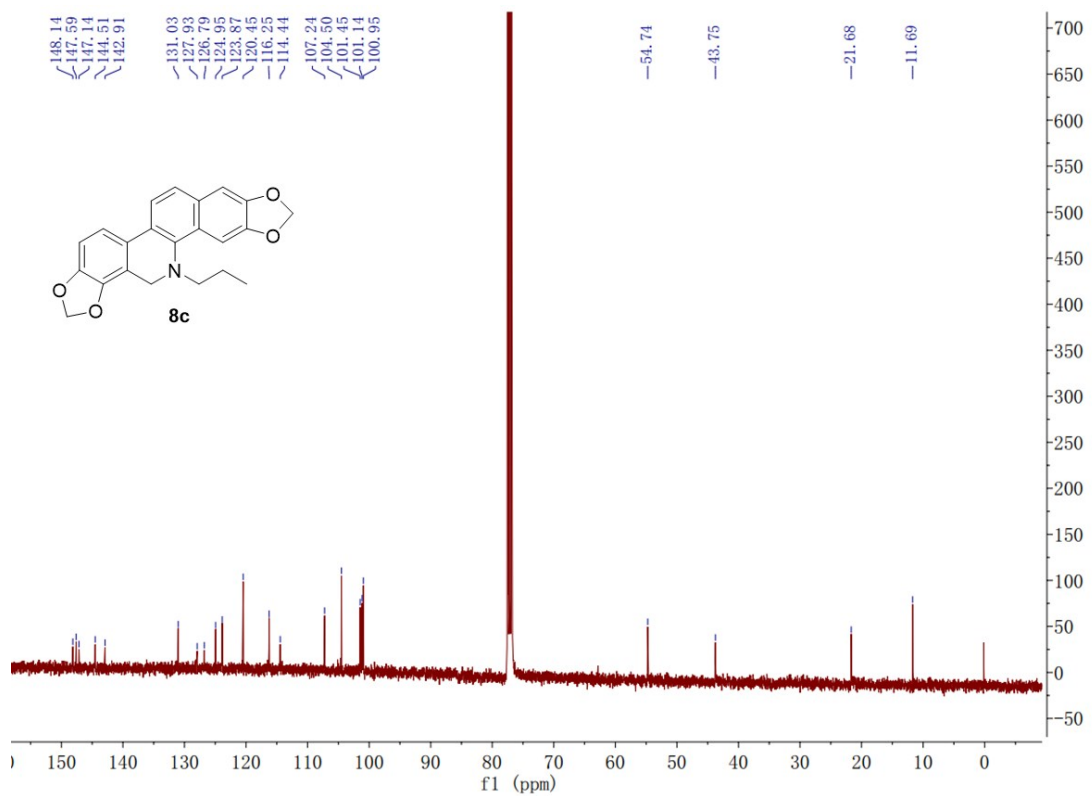

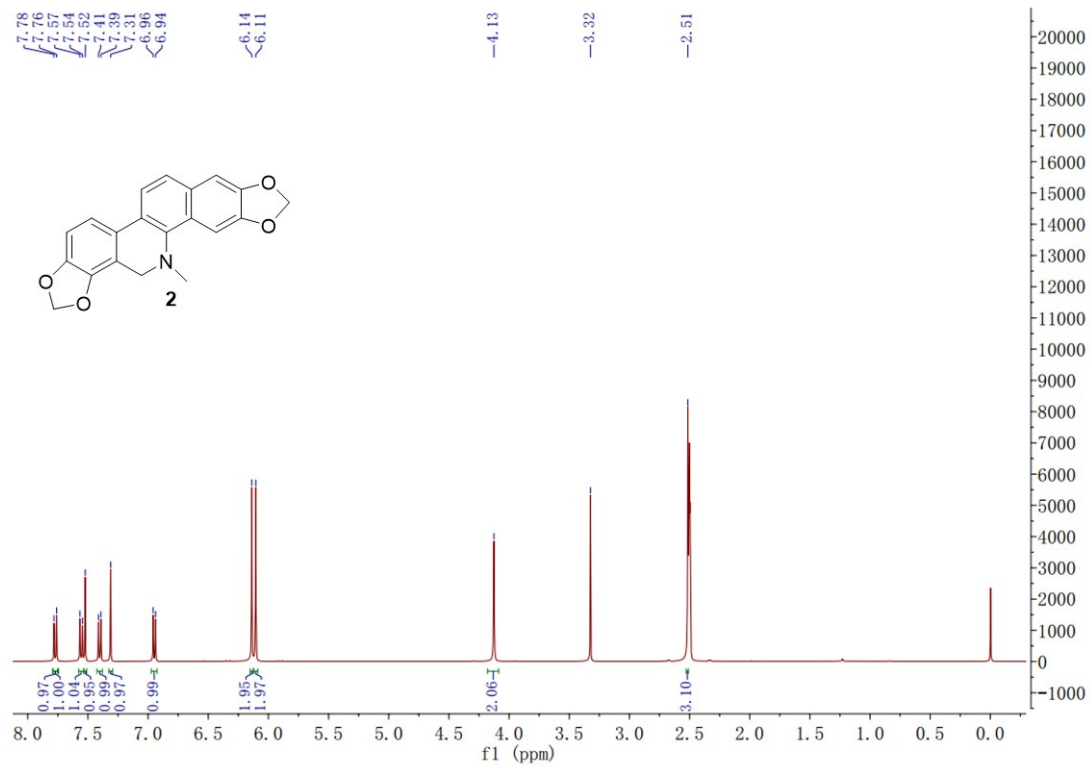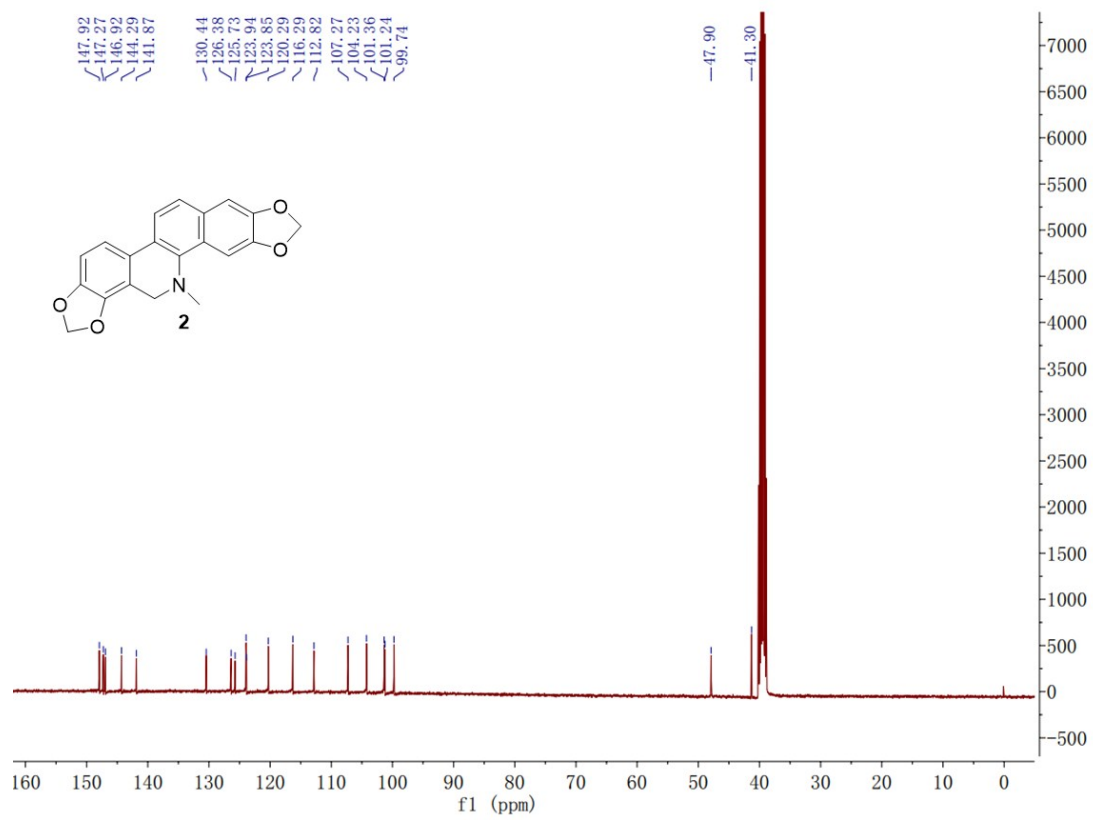



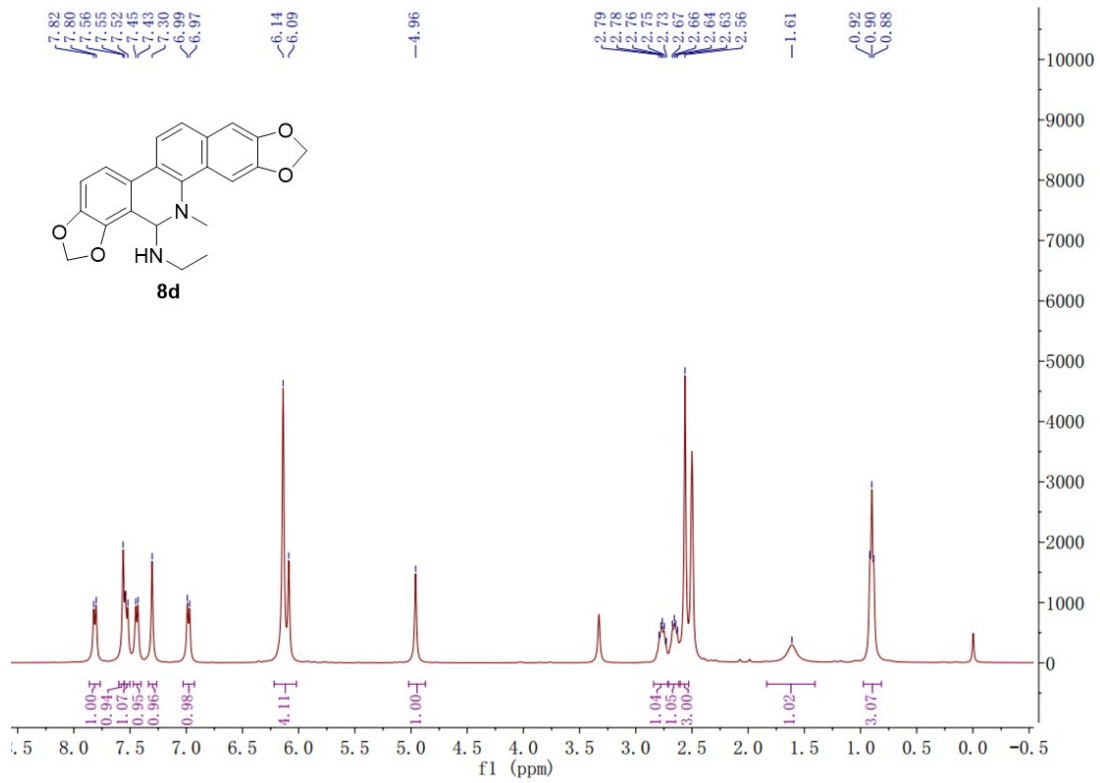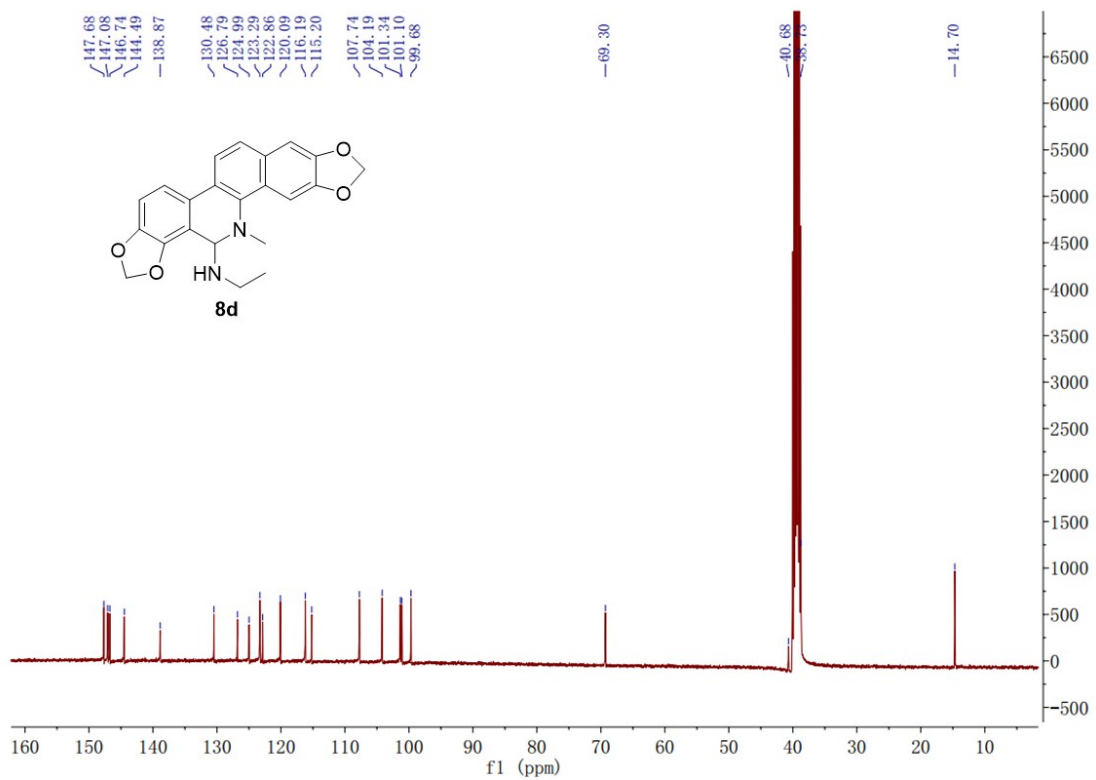

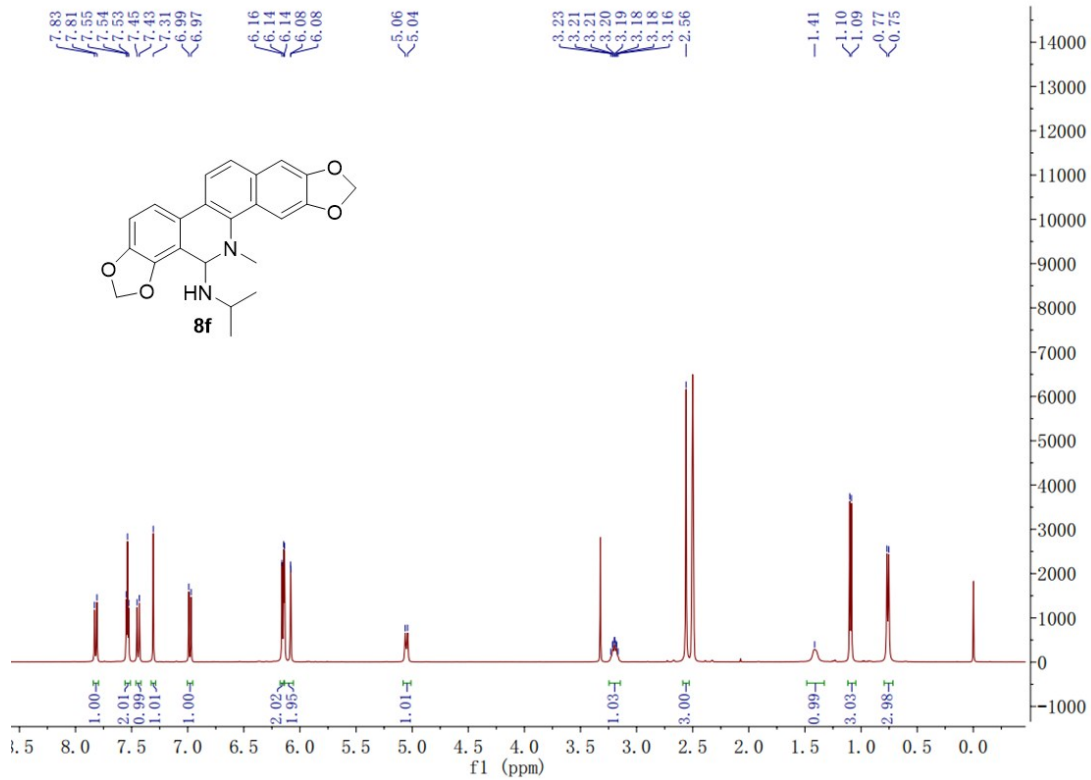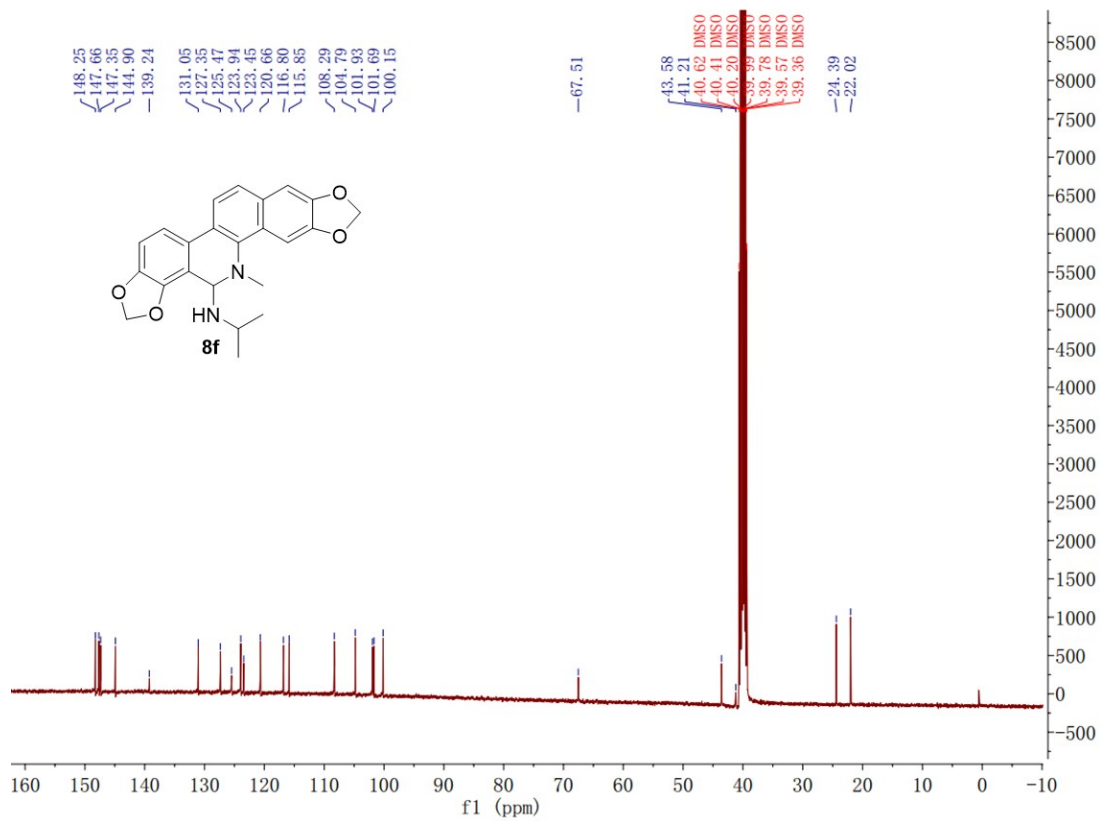

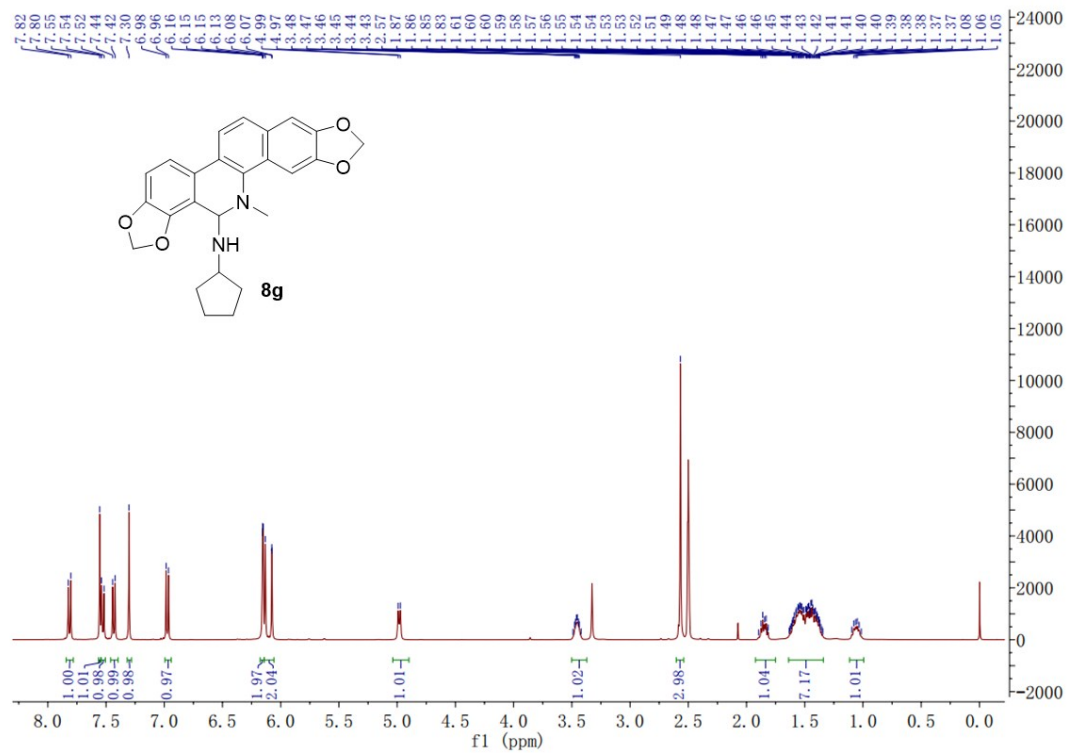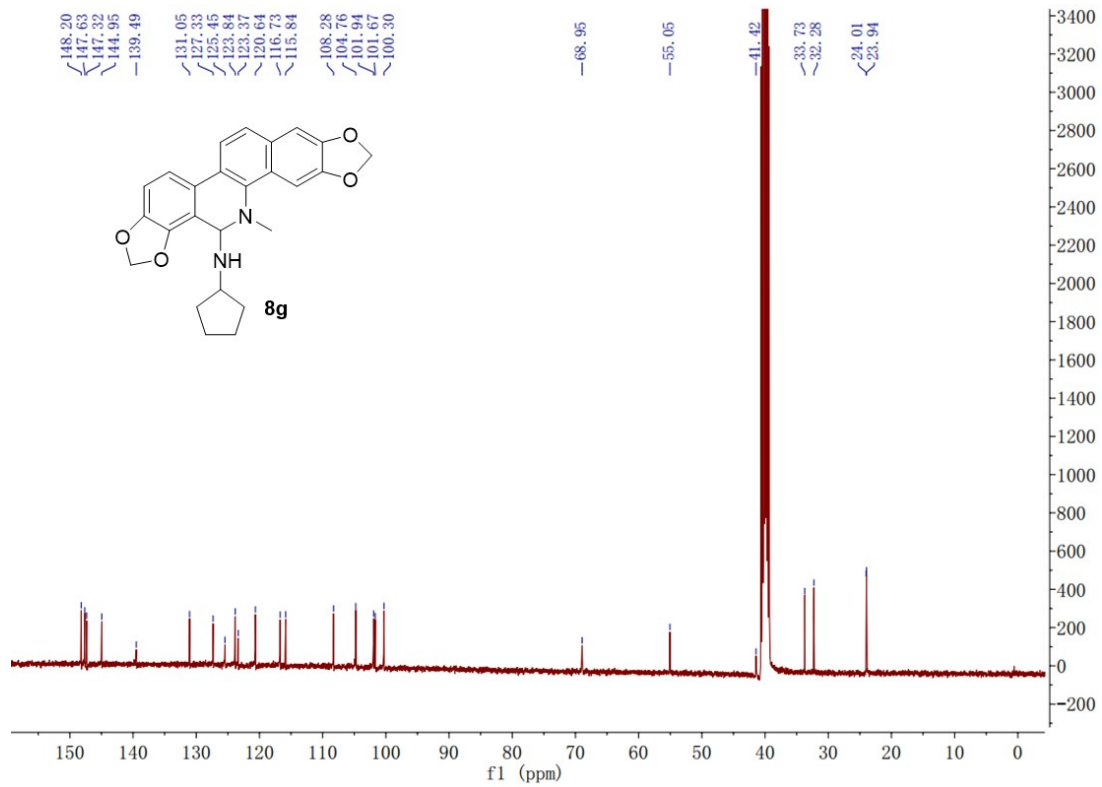

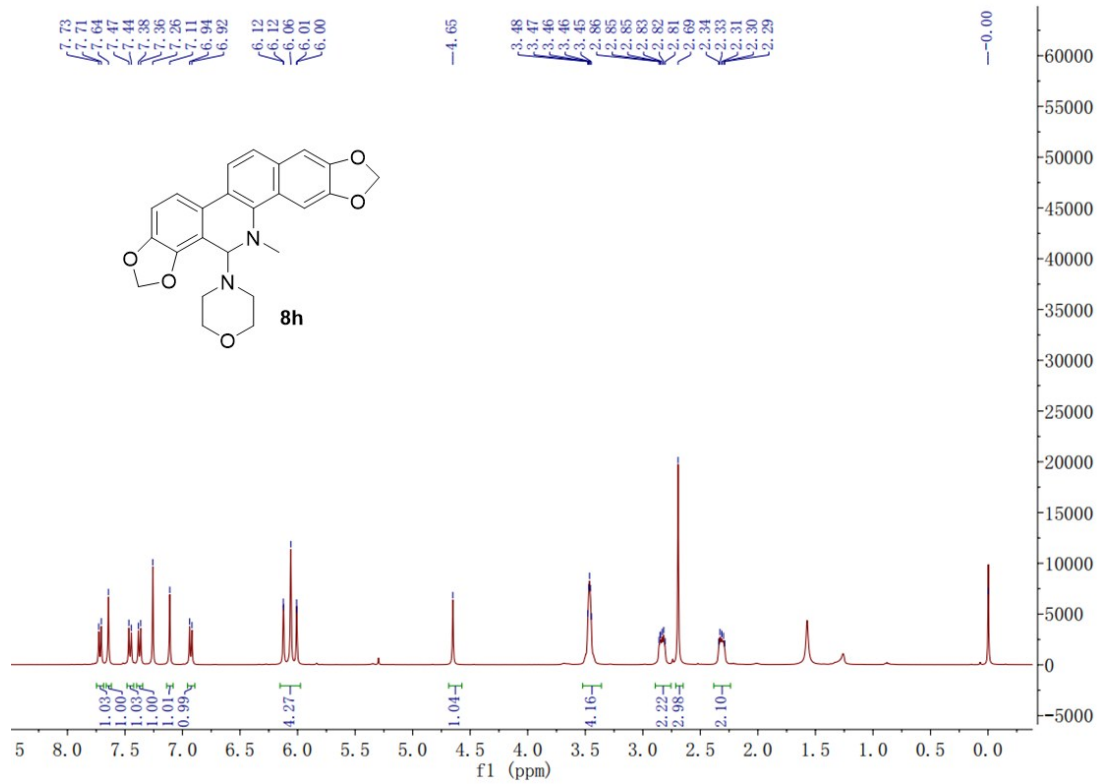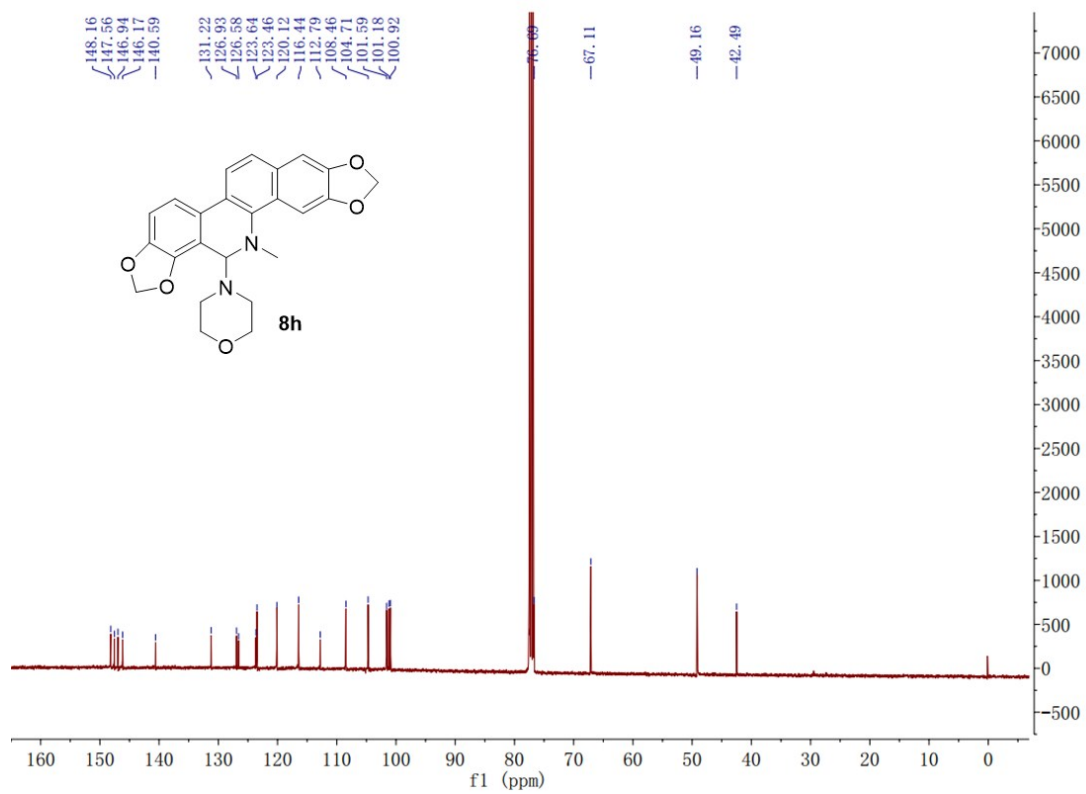

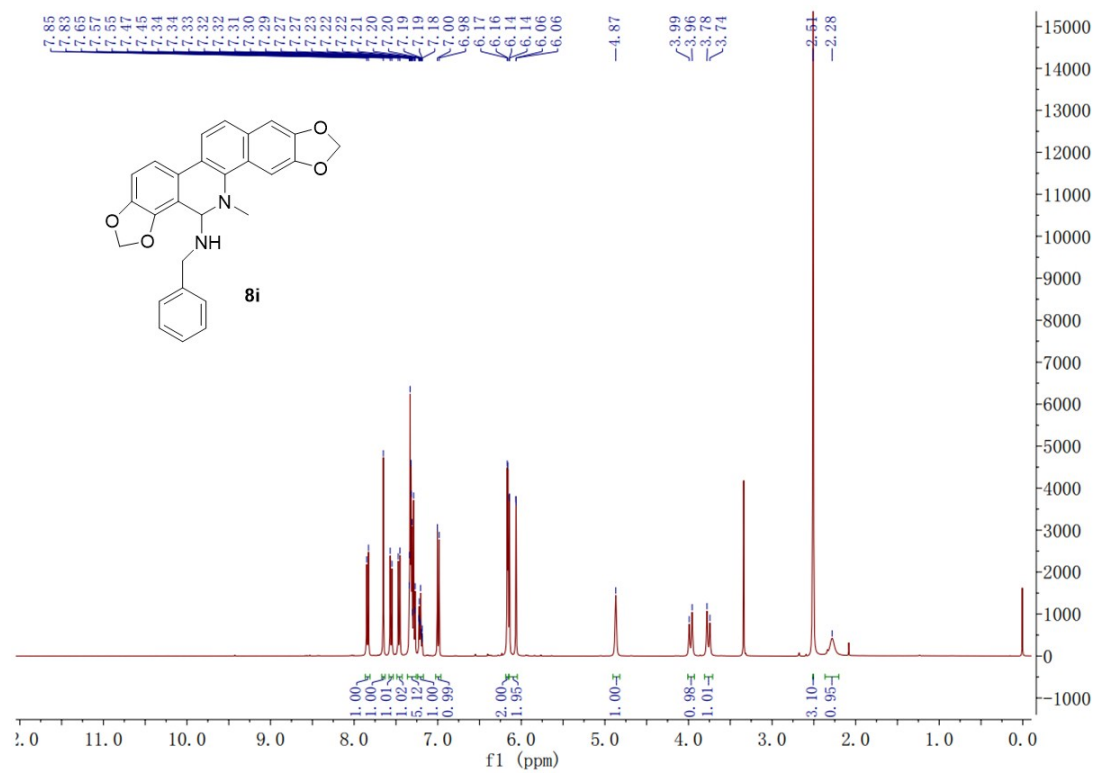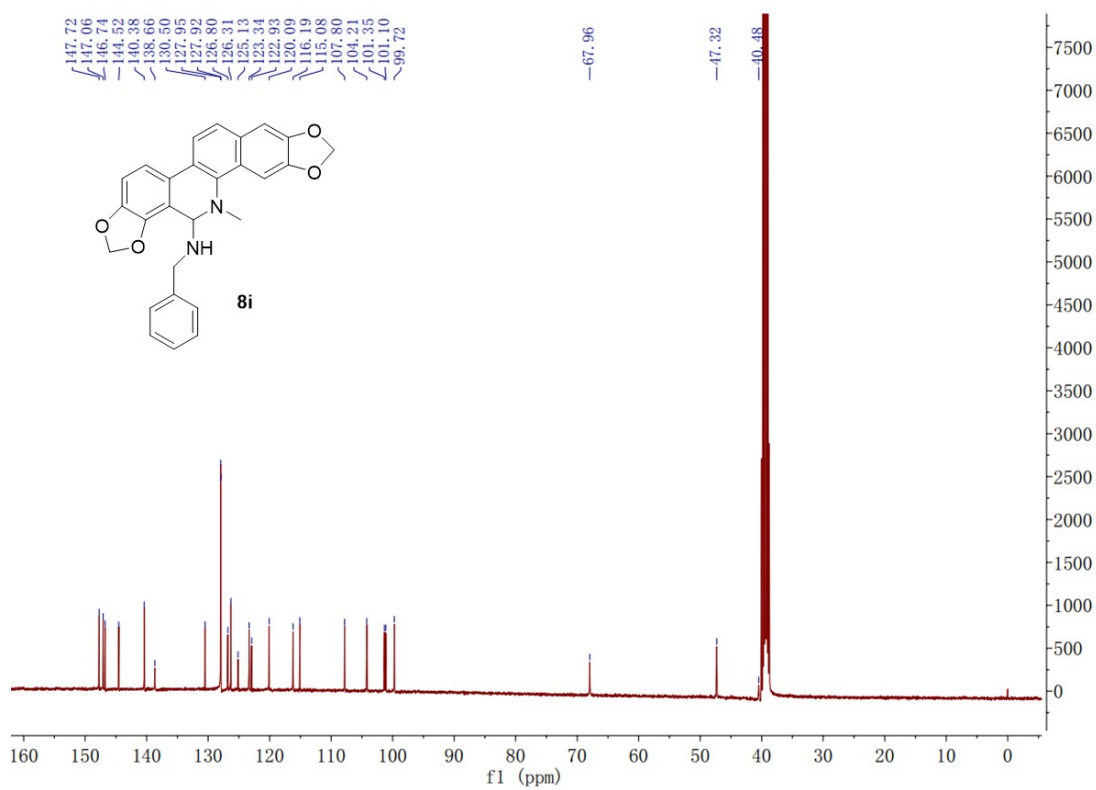

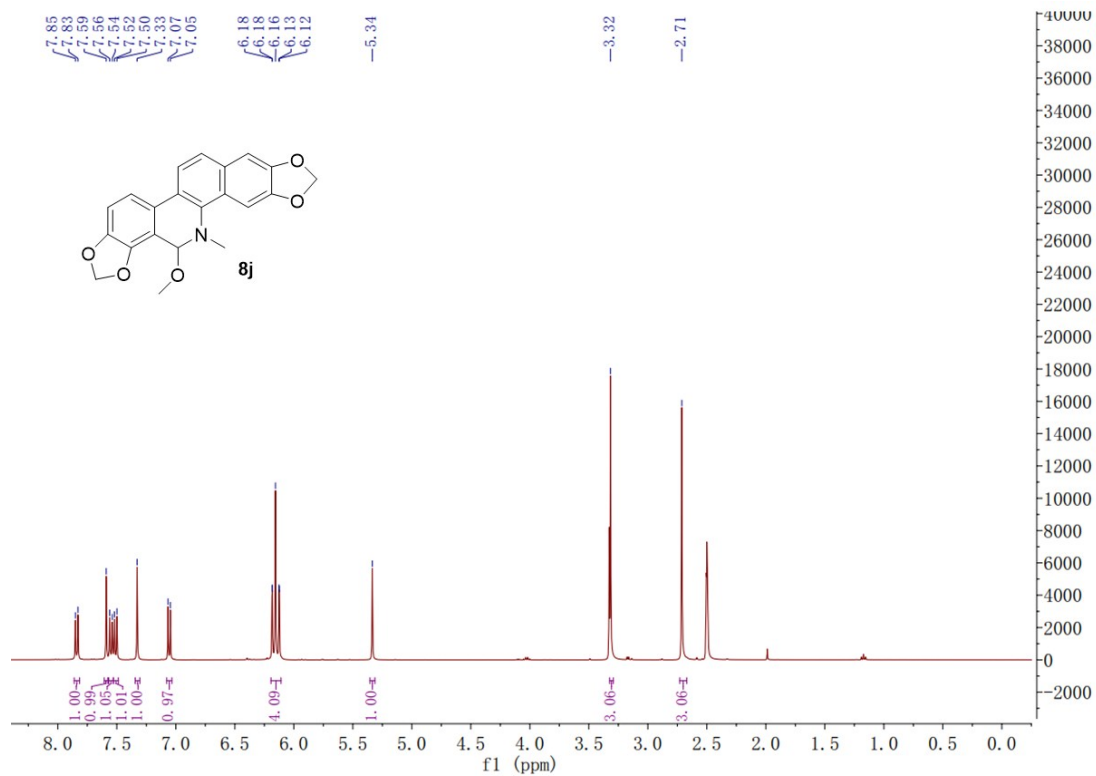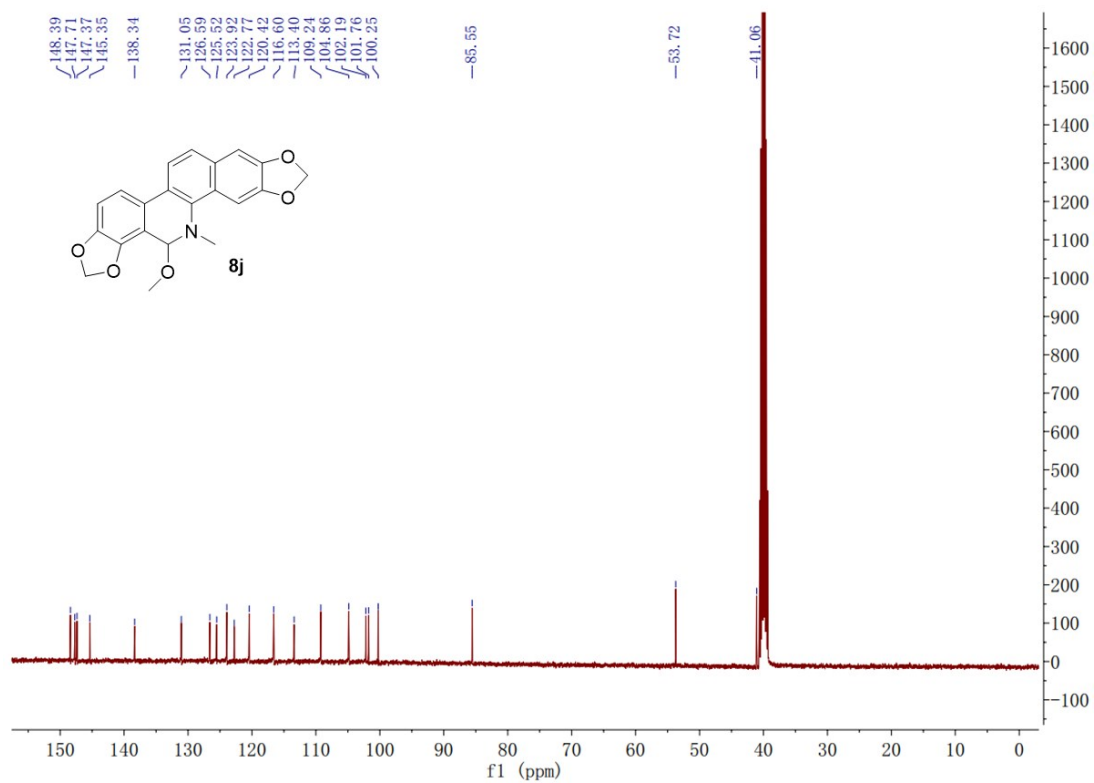

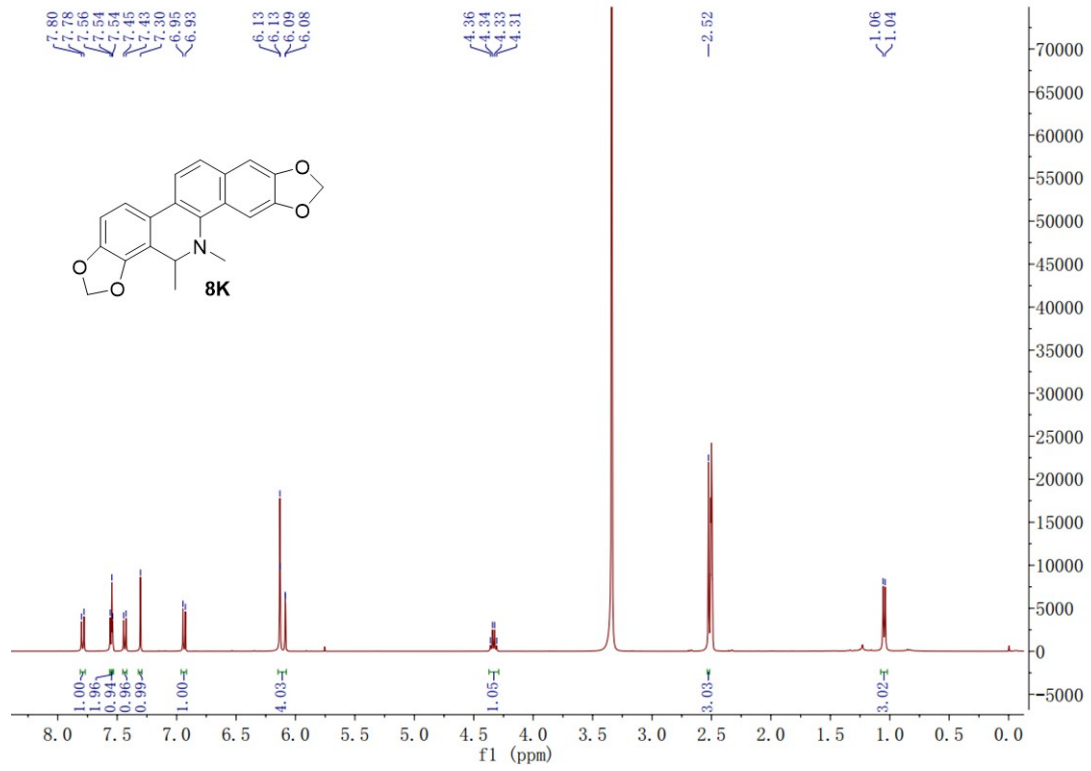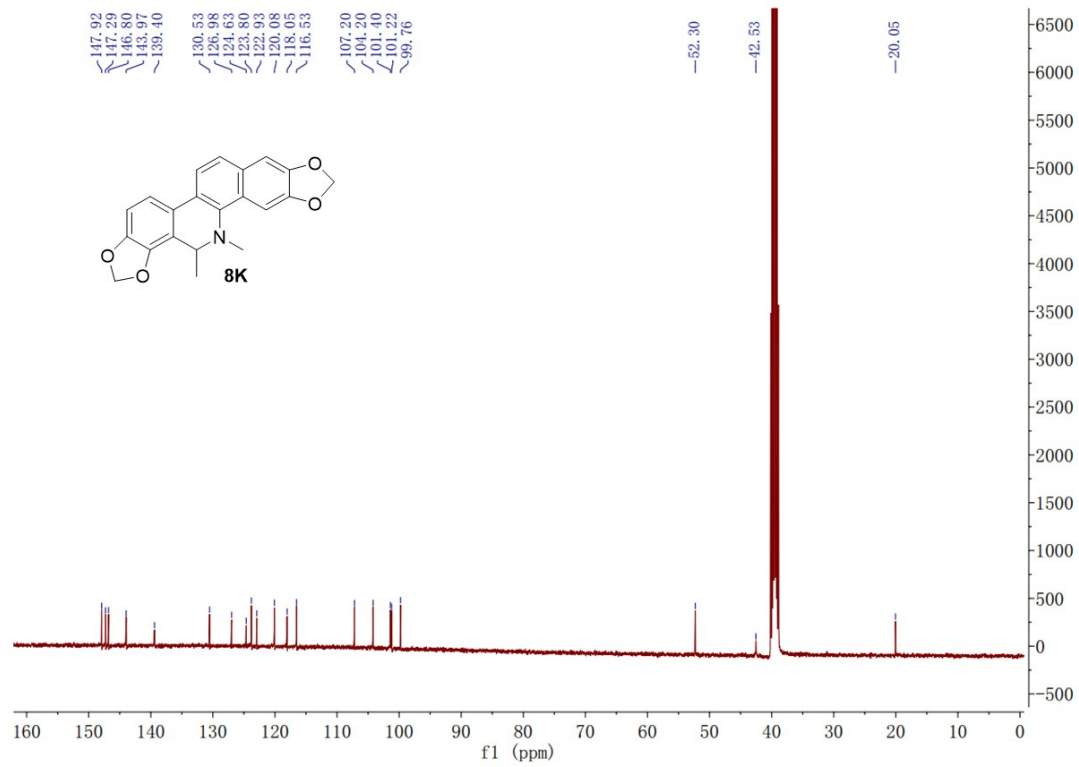

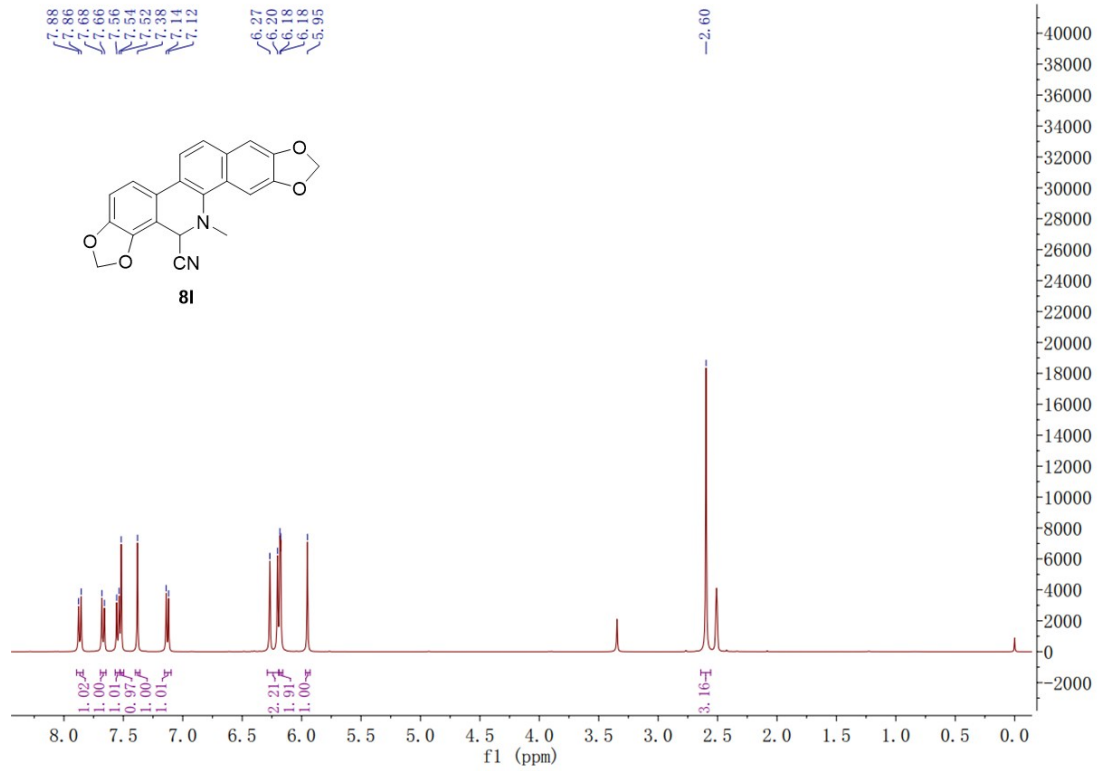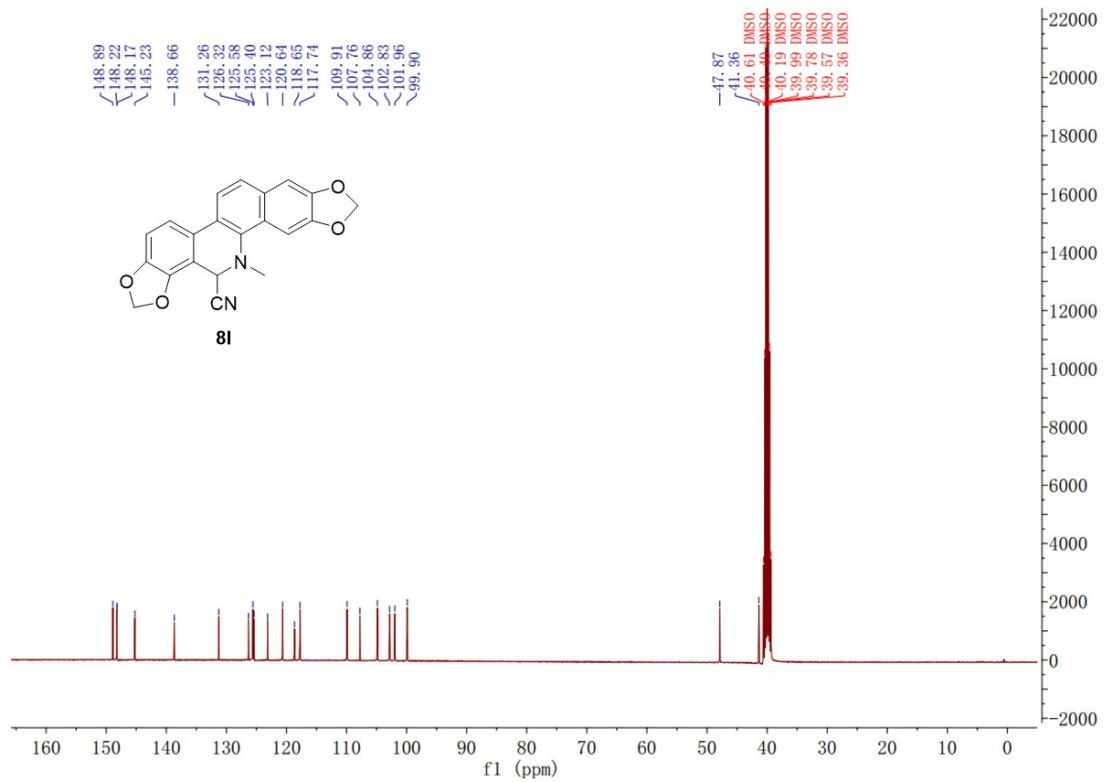



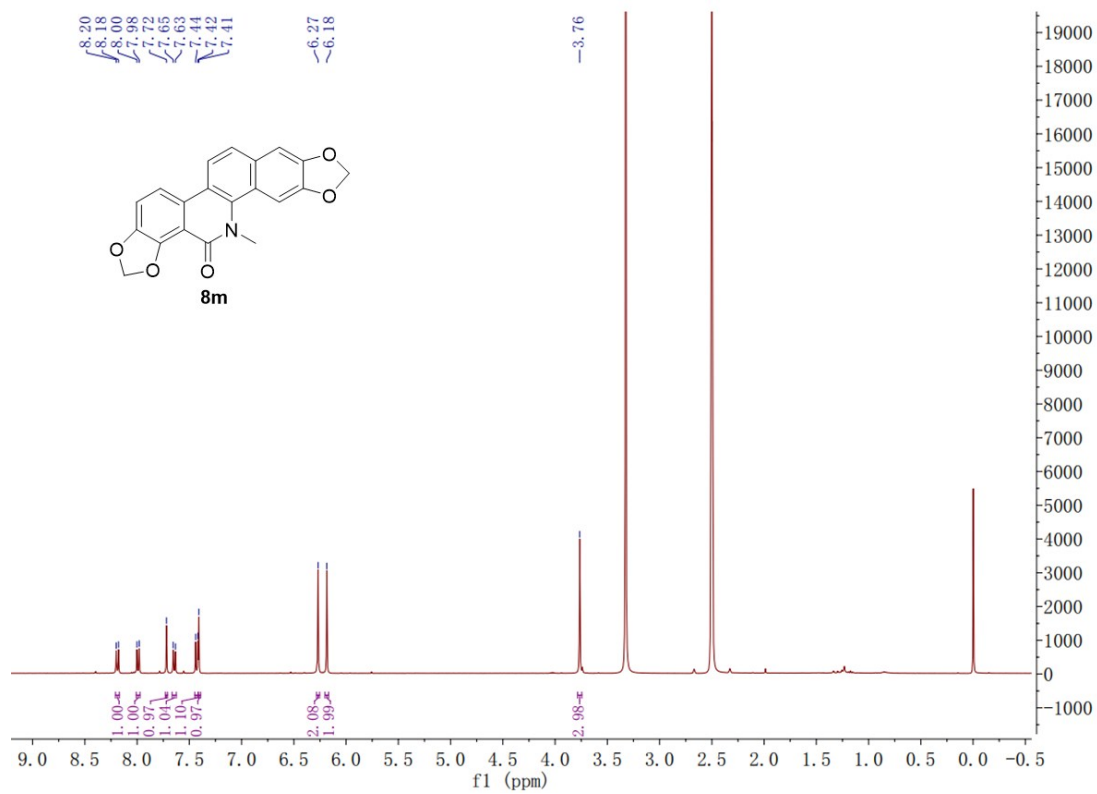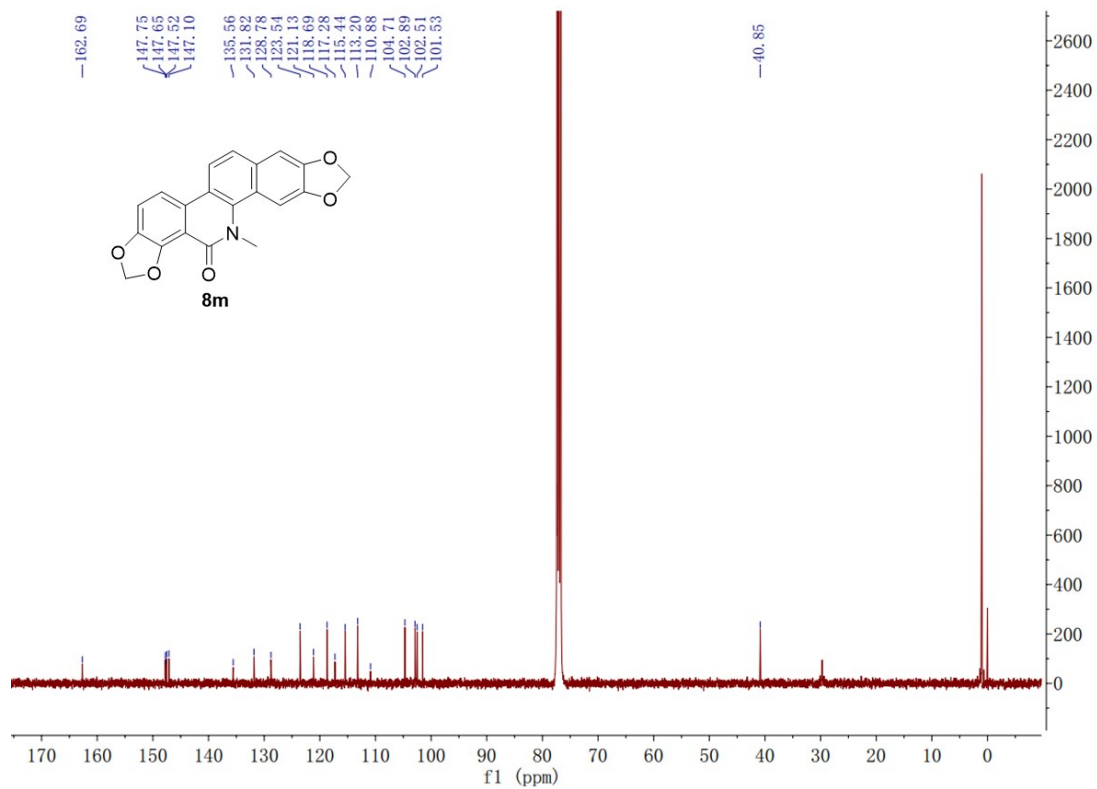

# HPLC Purity Analysis

## HPLC Purity Analysis of 8a

Acq. Operator : 系统  
 Sample Operator : 系统  
 Acq. Instrument : 1260LC Location : 11  
 Injection Date : 18/07/2018 11:11:46 Inj Volume : 5.000 µl  
 Acq. Method : C:\Chem32\1\Methods\DEF\_LC.M  
 Last changed : 18/07/2018 11:17:28 by 系统  
 (modified after loading)  
 Analysis Method : E:\DK\TL\方法\80C-200-20MIN-20UL.M  
 Last changed : 01/08/2017 11:44:14 by 系统

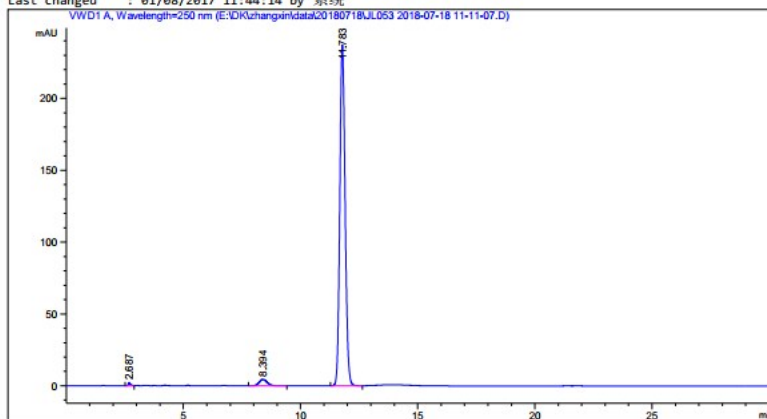

=====  
 Area Percent Report  
 =====

Sorted By : Signal  
 Multiplier : 2.0000  
 Dilution : 1.0000  
 Sample Amount : 10.00000 [ng/ul] (not used in calc.)  
 Use Multiplier & Dilution Factor with ISTDs

Signal 1: VWD1 A, Wavelength=250 nm

| Peak # | RetTime [min] | Type | Width [min] | Area [mAU*s] | Height [mAU] | Area %  |
|--------|---------------|------|-------------|--------------|--------------|---------|
| 1      | 2.687         | BB   | 0.0966      | 14.79608     | 2.19736      | 0.3829  |
| 2      | 8.394         | BB   | 0.3710      | 108.04200    | 4.50100      | 2.7960  |
| 3      | 11.783        | BB   | 0.2439      | 3741.26123   | 237.34528    | 96.8210 |

Totals : 3864.09931 244.04363

# HPLC Purity Analysis of 8b

Acq. Operator : 系统  
 Sample Operator : 系统  
 Acq. Instrument : 1260LC  
 Injection Date : 18/07/2018 14:38:35  
 Location : 22  
 Inj Volume : 15.000 µl  
 Method : E:\DK\TL\方法\90C-10A-30min-1u.M  
 Last changed : 18/07/2018 14:37:40 by 系统  
 (modified after loading)

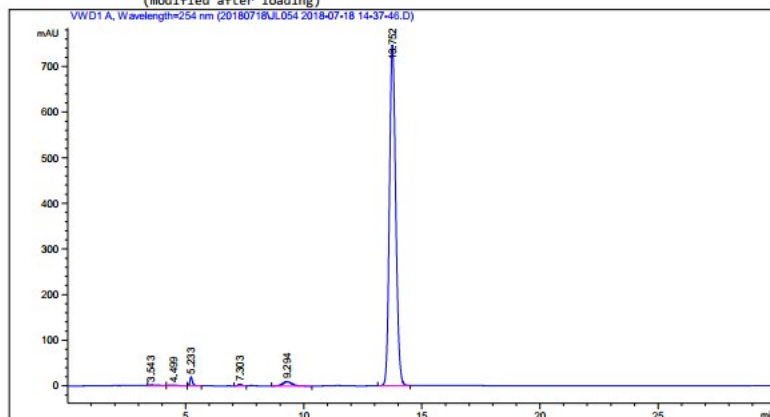

## Area Percent Report

Sorted By : Signal  
 Multiplier : 2.0000  
 Dilution : 1.0000  
 Sample Amount : 10.00000 [ng/ul] (not used in calc.)  
 Use Multiplier & Dilution Factor with ISTDs

Signal 1: VWD1 A, Wavelength=254 nm

| Peak # | RetTime [min] | Type | Width [min] | Area [mAU*s] | Height [mAU] | Area %  |
|--------|---------------|------|-------------|--------------|--------------|---------|
| 1      | 3.543         | VV   | 0.3394      | 48.96468     | 1.81678      | 0.3412  |
| 2      | 4.499         | VB   | 0.3099      | 41.13912     | 1.72063      | 0.2866  |
| 3      | 5.233         | BV R | 0.1121      | 146.29930    | 19.81963     | 1.0193  |
| 4      | 7.303         | BB   | 0.1660      | 34.27641     | 3.19803      | 0.2388  |
| 5      | 9.294         | BB   | 0.4175      | 253.01122    | 9.35623      | 1.7629  |
| 6      | 13.752        | BB   | 0.2870      | 1.38286e4    | 746.84760    | 96.3512 |

Totals : 1.43523e4 782.75889

# HPLC Purity Analysis of 8c

Acq. Operator : 系统  
 Sample Operator : 系统  
 Acq. Instrument : 1260LC Location : 21  
 Injection Date : 18/07/2018 11:59:15 Inj Volume : 25.000 µl  
 Acq. Method : E:\DK\TL\方法\90C-10A-30min-1u.M  
 Last changed : 18/07/2018 11:57:57 by 系统  
 (modified after loading)  
 Analysis Method : E:\DK\TL\方法\80C-200-20MIN-20UL.M  
 Last changed : 01/08/2017 11:44:14 by 系统

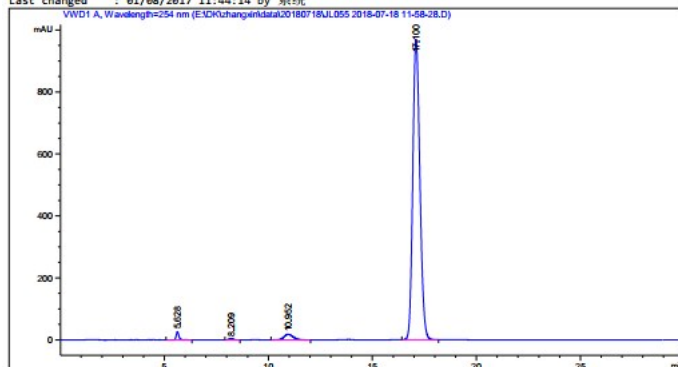

## Area Percent Report

Sorted By : Signal  
 Multiplier : 2.0000  
 Dilution : 1.0000  
 Sample Amount : 10.00000 [ng/ul] (not used in calc.)  
 Use Multiplier & Dilution Factor with ISTDs

Signal 1: VWD1 A, Wavelength=254 nm

| Peak # | RetTime [min] | Type | Width [min] | Area [mAU*s] | Height [mAU] | Area %  |
|--------|---------------|------|-------------|--------------|--------------|---------|
| 1      | 5.628         | BB R | 0.1364      | 241.19193    | 26.94648     | 1.0134  |
| 2      | 8.209         | BB   | 0.1987      | 58.34347     | 4.51754      | 0.2451  |
| 3      | 10.952        | BB   | 0.4710      | 552.49304    | 18.10527     | 2.3214  |
| 4      | 17.100        | BB   | 0.3683      | 2.29477e4    | 969.06537    | 96.4200 |

Totals : 2.37997e4 1018.63465

## HPLC Purity Analysis of 8d

Acq. Operator : 系统  
 Sample Operator : 系统  
 Acq. Instrument : 1260LC Location : 12  
 Injection Date : 12/05/2018 11:14:35 Inj Volume : 15.000 µl  
 Acq. Method : E:\DK\ZHANGXIN\METHOD\90C-10A-40Min-5ul.M  
 Last changed : 12/05/2018 10:21:57 by 系统  
 (modified after loading)  
 Analysis Method : E:\DK\TL\方法\80C-20D-20MIN-20UL.M  
 Last changed : 01/08/2017 11:44:14 by 系统

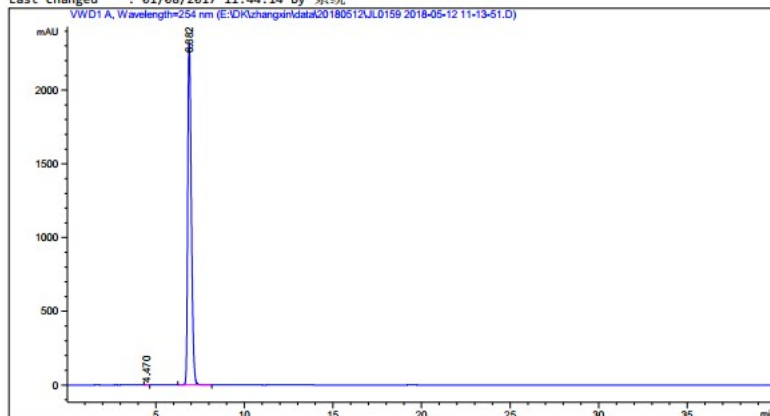

### Area Percent Report

Sorted By : Signal  
 Multiplier : 1.0000  
 Dilution : 1.0000  
 Sample Amount: : 5.00000 [ng/ul] (not used in calc.)  
 Use Multiplier & Dilution Factor with ISTDs

Signal 1: VWD1 A, Wavelength=254 nm

| Peak # | RetTime [min] | Type | Width [min] | Area [mAU*s] | Height [mAU] | Area %  |
|--------|---------------|------|-------------|--------------|--------------|---------|
| 1      | 4.470         | VB   | 0.1173      | 14.28067     | 1.80530      | 0.0435  |
| 2      | 6.882         | BB   | 0.2183      | 3.28071e4    | 2315.02637   | 99.9565 |

Totals : 3.28214e4 2316.83167

## HPLC Purity Analysis of 8e

Acq. Operator : 系统  
 Sample Operator : 系统  
 Acq. Instrument : 1260LC Location : 13  
 Injection Date : 18/04/2018 20:56:03 Inj Volume : 15.000 µl  
 Acq. Method : E:\DK\ZHANGXIN\METHOD\90C-10A-40Min-5uL.M  
 Last changed : 18/04/2018 18:34:59 by 系统  
 (modified after loading)  
 Analysis Method : E:\DK\TL\方法\80C-20D-20MIN-20UL.M  
 Last changed : 01/08/2017 11:44:14 by 系统

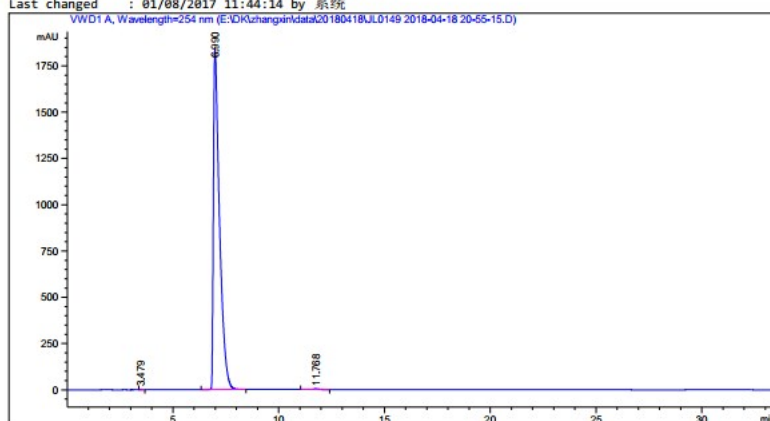

### Area Percent Report

Sorted By : Signal  
 Multiplier : 1.0000  
 Dilution : 1.0000  
 Sample Amount : 5.00000 [ng/ul] (not used in calc.)  
 Use Multiplier & Dilution Factor with ISTDs

Signal 1: Vwd1 A, Wavelength=254 nm

| Peak # | RetTime [min] | Type | Width [min] | Area [mAU*s] | Height [mAU] | Area %  |
|--------|---------------|------|-------------|--------------|--------------|---------|
| 1      | 3.479         | VB   | 0.0988      | 16.01152     | 2.40145      | 0.0434  |
| 2      | 6.990         | BB   | 0.2870      | 3.68041e4    | 1842.73682   | 99.7766 |
| 3      | 11.768        | VB R | 0.2694      | 66.40449     | 3.70020      | 0.1800  |

Totals : 3.68865e4 1848.83847

## HPLC Purity Analysis of 8f

Acq. Operator : 系统  
 Sample Operator : 系统  
 Acq. Instrument : 1260LC Location : 3  
 Injection Date : 18/04/2018 19:11:21 Inj Volume : 15.000 µl  
 Acq. Method : E:\DK\ZHANGXIN\METHOD\90C-10A-40Min-5uL.M  
 Last changed : 18/04/2018 18:34:59 by 系统  
 (modified after loading)  
 Analysis Method : E:\DK\TL\方法\80C-200-20MIN-20UL.M  
 Last changed : 01/08/2017 11:44:14 by 系统

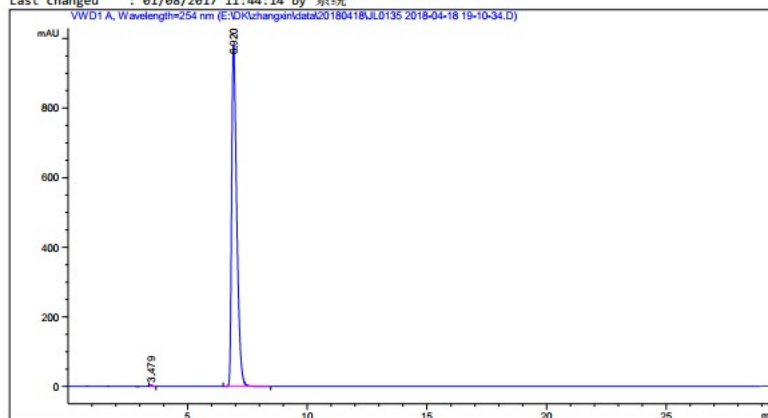

### Area Percent Report

Sorted By : Signal  
 Multiplier : 1.0000  
 Dilution : 1.0000  
 Sample Amount : 5.00000 [ng/ul] (not used in calc.)  
 Use Multiplier & Dilution Factor with ISTDs

Signal 1: VWD1 A, Wavelength=254 nm

| Peak # | RetTime [min] | Type | Width [min] | Area [mAU*s] | Height [mAU] | Area %  |
|--------|---------------|------|-------------|--------------|--------------|---------|
| 1      | 3.479         | VB   | 0.0964      | 26.38414     | 4.13907      | 0.1804  |
| 2      | 6.920         | BB   | 0.2256      | 1.45986e4    | 980.88928    | 99.8196 |

Totals : 1.46250e4 985.02835

## HPLC Purity Analysis of 8g

Acq. Operator : 系统  
Sample Operator : 系统  
Acq. Instrument : 1260LC Location : 3  
Injection Date : 13/06/2018 15:34:55 Inj Volume : 5.000 µl  
Acq. Method : E:\DK\TL\方法\90C-10A-30min-1u.M  
Last changed : 04/07/2017 19:18:29 by 系统  
Analysis Method : E:\DK\TL\方法\80C-20D-20MIN-20UL.M  
Last changed : 01/08/2017 11:44:14 by 系统

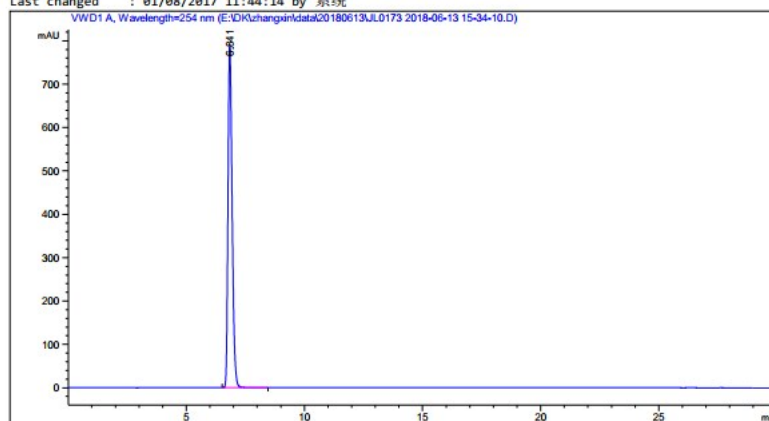

=====  
Area Percent Report  
=====

Sorted By : Signal  
Multiplier : 2.0000  
Dilution : 1.0000  
Sample Amount : 5.00000 [ng/ul] (not used in calc.)  
Use Multiplier & Dilution Factor with ISTDs

Signal 1: VWD1 A, Wavelength=254 nm

| Peak # | RetTime [min] | Type | Width [min] | Area [mAU*s] | Height [mAU] | Area %   |
|--------|---------------|------|-------------|--------------|--------------|----------|
| 1      | 6.841         | BB   | 0.1886      | 9619.76270   | 786.90442    | 100.0000 |

Totals : 9619.76270 786.90442



## HPLC Purity Analysis of 8h

Acq. Operator : 系统  
 Sample Operator : 系统  
 Acq. Instrument : 1260LC Location : 12  
 Injection Date : 18/04/2018 20:14:30 Inj Volume : 15.000 µl  
 Acq. Method : E:\DK\ZHANGXIN\METHOD\90C-10A-40Min-5uL.M  
 Last changed : 18/04/2018 18:34:59 by 系统  
 (modified after loading)  
 Analysis Method : E:\DK\TL\方法\80C-20D-20MIN-20UL.M  
 Last changed : 01/08/2017 11:44:14 by 系统

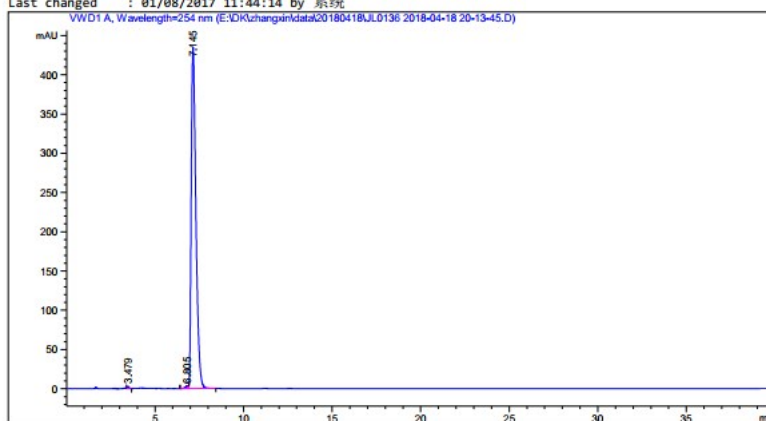

### Area Percent Report

Sorted By : Signal  
 Multiplier : 1.0000  
 Dilution : 1.0000  
 Sample Amount : 5.00000 [ng/ul] (not used in calc.)  
 Use Multiplier & Dilution Factor with ISTDs

Signal 1: Vwd1 A, Wavelength=254 nm

| Peak # | RetTime [min] | Type | Width [min] | Area [mAU*s] | Height [mAU] | Area %  |
|--------|---------------|------|-------------|--------------|--------------|---------|
| 1      | 3.479         | VB   | 0.0948      | 18.06529     | 2.85508      | 0.2257  |
| 2      | 6.805         | BV E | 0.1571      | 32.98967     | 3.10186      | 0.4122  |
| 3      | 7.145         | VB R | 0.2814      | 7952.07910   | 434.64624    | 99.3621 |

Totals : 8003.13406 440.60318

## HPLC Purity Analysis of 8i

Acq. Operator : 系统  
 Sample Operator : 系统  
 Acq. Instrument : 1260LC Location : 2  
 Injection Date : 13/06/2018 16:17:49 Inj Volume : 5.000 µl  
 Acq. Method : E:\DK\TL\方法\90C-10A-30min-1u.M  
 Last changed : 04/07/2017 19:18:29 by 系统  
 Analysis Method : E:\DK\TL\方法\80C-20D-20MIN-20UL.M  
 Last changed : 01/08/2017 11:44:14 by 系统

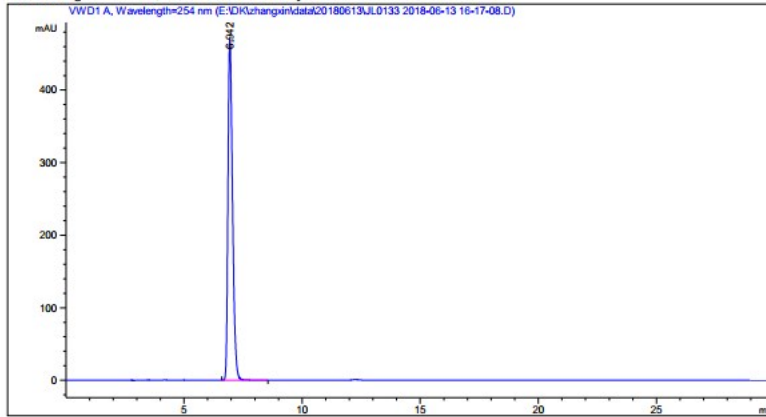

=====  
 Area Percent Report  
 =====

Sorted By : Signal  
 Multiplier : 2.0000  
 Dilution : 1.0000  
 Sample Amount: : 5.00000 [ng/ul] (not used in calc.)  
 Use Multiplier & Dilution Factor with ISTDs

Signal 1: VWD1 A, Wavelength=254 nm

| Peak # | RetTime [min] | Type | Width [min] | Area [mAU*s] | Height [mAU] | Area %   |
|--------|---------------|------|-------------|--------------|--------------|----------|
| 1      | 6.942         | BB   | 0.2081      | 6328.11084   | 469.86807    | 100.0000 |

Totals : 6328.11084 469.86807

## HPLC Purity Analysis of 8j

Acq. Operator : 系统  
 Sample Operator : 系统  
 Acq. Instrument : 1260LC Location : 1  
 Injection Date : 24/03/2018 13:44:21 Inj Volume : 5.000 µl  
 Acq. Method : E:\DK\DYX\90C-10A-40MIN-5uL.M  
 Last changed : 27/01/2018 20:34:38 by 系统  
 Analysis Method : E:\DK\TL\方法\80C-200-20MIN-20UL.M  
 Last changed : 01/08/2017 11:44:14 by 系统

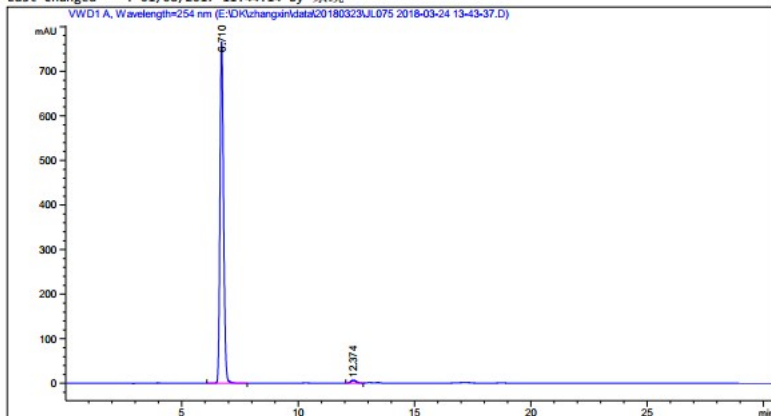

=====  
 Area Percent Report  
 =====

Sorted By : Signal  
 Multiplier : 1.0000  
 Dilution : 1.0000  
 Sample Amount: : 20.00000 [ng/ul] (not used in calc.)  
 Use Multiplier & Dilution Factor with ISTDs

Signal 1: VWD1 A, Wavelength=254 nm

| Peak # | RetTime [min] | Type | Width [min] | Area [mAU*s] | Height [mAU] | Area %  |
|--------|---------------|------|-------------|--------------|--------------|---------|
| 1      | 6.710         | VB R | 0.1657      | 8176.02734   | 764.93518    | 98.7660 |
| 2      | 12.374        | BB   | 0.2478      | 102.15154    | 6.41491      | 1.2340  |

Totals : 8278.17889 771.35009

# HPLC Purity Analysis of 8k

Acq. Operator : 系统  
 Sample Operator : 系统  
 Acq. Instrument : 1260LC Location : 11  
 Injection Date : 18/04/2018 19:43:07 Inj Volume : 15.000 µl  
 Acq. Method : E:\DK\ZHANGXIN\METHOD\90C-10A-40Min-5uL.M  
 Last changed : 18/04/2018 18:34:59 by 系统  
 (modified after loading)  
 Analysis Method : E:\DK\TL\方法\80C-20D-20MIN-20UL.M  
 Last changed : 01/08/2017 11:44:14 by 系统

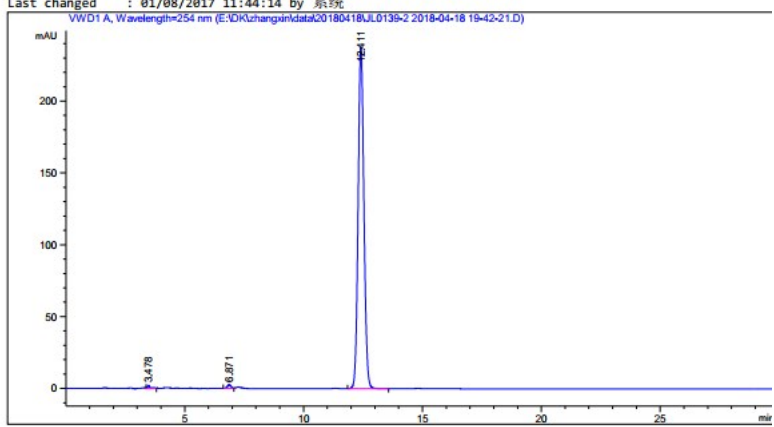

=====  
 Area Percent Report  
 =====

Sorted By : Signal  
 Multiplier : 1.0000  
 Dilution : 1.0000  
 Sample Amount : 5.00000 [ng/ul] (not used in calc.)  
 Use Multiplier & Dilution Factor with ISTDs

Signal 1: VWD1 A, Wavelength=254 nm

| Peak # | RetTime [min] | Type | Width [min] | Area [mAU*s] | Height [mAU] | Area %  |
|--------|---------------|------|-------------|--------------|--------------|---------|
| 1      | 3.478         | VV R | 0.1091      | 16.61591     | 2.20112      | 0.4084  |
| 2      | 6.871         | BV   | 0.1691      | 27.18153     | 2.49476      | 0.6680  |
| 3      | 12.411        | BB   | 0.2627      | 4025.15674   | 237.49684    | 98.9236 |

Totals : 4068.95418 242.19272

# HPLC Purity Analysis of 8I

Acq. Operator : 系统  
 Sample Operator : 系统  
 Acq. Instrument : 1260LC Location : 2  
 Injection Date : 24/03/2018 14:17:39 Inj Volume : 5.000 µl  
 Acq. Method : E:\DK\DYX\90C-10A-40MIN-5uL.M  
 Last changed : 27/01/2018 20:34:38 by 系统  
 Analysis Method : E:\DK\TL\方法\80C-200-20MIN-20UL.M  
 Last changed : 01/08/2017 11:44:14 by 系统

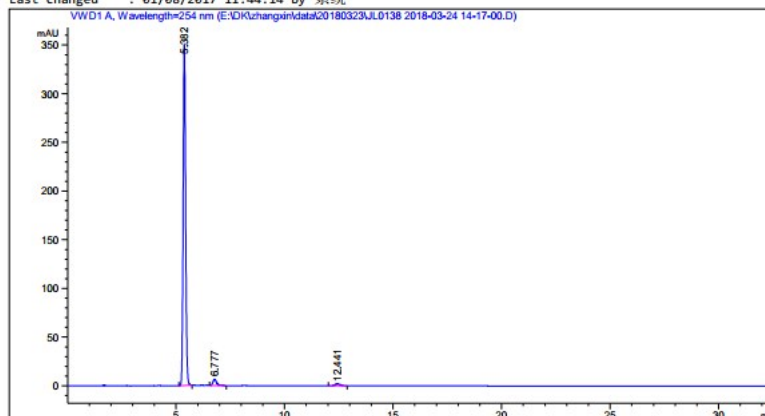

## Area Percent Report

Sorted By : Signal  
 Multiplier : 1.0000  
 Dilution : 1.0000  
 Sample Amount : 20.00000 [ng/ul] (not used in calc.)  
 Use Multiplier & Dilution Factor with ISTDs

Signal 1: VWD1 A, Wavelength=254 nm

| Peak # | RetTime [min] | Type | Width [min] | Area [mAU*s] | Height [mAU] | Area %  |
|--------|---------------|------|-------------|--------------|--------------|---------|
| 1      | 5.382         | BB   | 0.1232      | 2768.77344   | 350.45569    | 96.1217 |
| 2      | 6.777         | BV R | 0.1846      | 80.14971     | 6.55704      | 2.7825  |
| 3      | 12.441        | BB   | 0.2520      | 31.56367     | 1.92786      | 1.0958  |

Totals : 2880.48682 358.94059

## HPLC Purity Analysis of 8m

Acq. Operator : 系统  
 Sample Operator : 系统  
 Acq. Instrument : 1260LC Location : 21  
 Injection Date : 12/05/2018 12:03:09 Inj Volume : 5.000 µl  
 Acq. Method : E:\DK\ZHANGXIN\METHOD\90C-10A-40Min-SuL.M  
 Last changed : 12/05/2018 12:02:15 by 系统  
 (modified after loading)  
 Analysis Method : E:\DK\TL\方法\80C-200-20MIN-20UL.M  
 Last changed : 01/08/2017 11:44:14 by 系统

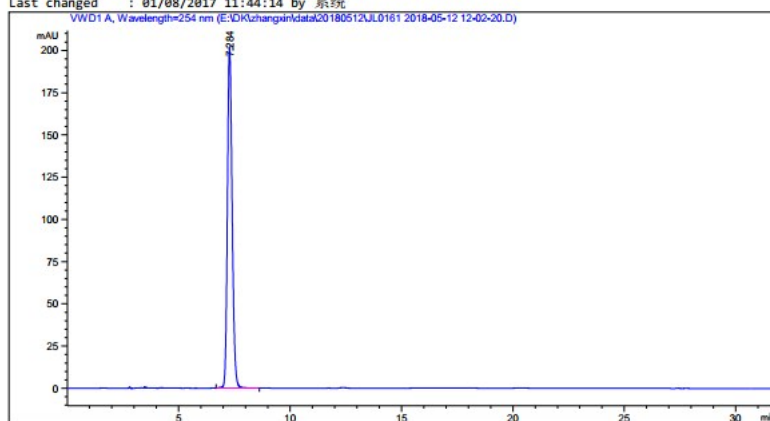

### Area Percent Report

Sorted By : Signal  
 Multiplier : 1.0000  
 Dilution : 1.0000  
 Sample Amount: : 5.00000 [ng/ul] (not used in calc.)  
 Use Multiplier & Dilution Factor with ISTDs

Signal 1: VWD1 A, Wavelength=254 nm

| Peak # | RetTime [min] | Type | Width [min] | Area [mAU*s] | Height [mAU] | Area %   |
|--------|---------------|------|-------------|--------------|--------------|----------|
| 1      | 7.284         | BB   | 0.2277      | 2985.99316   | 201.73741    | 100.0000 |

Totals : 2985.99316 201.73741
